# Supplementary material
Source: publisher figshare collection journal article supplement (https://acs.figshare.com/ndownloader/files/18129122)
Supplement: Supplementary file 1 [file 18129122]

**Electronic supplementary information**

**Synthesis and spectral properties of 8-anilinonaphthalene-1-sulfonic acid (ANS) derivatives prepared by microwave-assisted copper(0)-catalyzed Ullmann reaction**

Nan Wang,<sup>a</sup> Erik B. Faber<sup>a</sup> and Gunda I. Georg\*

Department of Medicinal Chemistry and Institute for Therapeutics Discovery and Development,  
College of Pharmacy, University of Minnesota, 717 Delaware Street, SE, Minneapolis, MN  
55414 (USA)

<sup>a</sup> These authors contributed equally to this work.

\*Corresponding author

Email address: georg@umn.edu

# Supporting Information

## Contents

|                                                    |            |
|----------------------------------------------------|------------|
| <b>I. Method Optimization.....</b>                 | <b>S4</b>  |
| <b>Scheme S1. ....</b>                             | <b>S4</b>  |
| <b>Table S1. Reaction optimization.....</b>        | <b>S5</b>  |
| <b>II. Spectra of analogs.....</b>                 | <b>S6</b>  |
| <b>Figure S1. Proton NMR for 3a.....</b>           | <b>S6</b>  |
| <b>Figure S2. Carbon NMR for 3a.....</b>           | <b>S7</b>  |
| <b>Figure S3. Fluorescent spectra for 3a.....</b>  | <b>S7</b>  |
| <b>Figure S4. Proton NMR for 3b.....</b>           | <b>S8</b>  |
| <b>Figure S5. Carbon NMR for 3b.....</b>           | <b>S9</b>  |
| <b>Figure S6. Fluorine NMR for 3b.....</b>         | <b>S10</b> |
| <b>Figure S7. Fluorescent spectra for 3b.....</b>  | <b>S10</b> |
| <b>Figure S8. Proton NMR for 3c.....</b>           | <b>S11</b> |
| <b>Figure S9. Carbon NMR for 3c.....</b>           | <b>S12</b> |
| <b>Figure S10. Fluorine NMR for 3c.....</b>        | <b>S13</b> |
| <b>Figure S11. Fluorescent spectra for 3c.....</b> | <b>S13</b> |
| <b>Figure S12. Proton NMR for 3d.....</b>          | <b>S14</b> |
| <b>Figure S13. Carbon NMR for 3d.....</b>          | <b>S15</b> |
| <b>Figure S14. Fluorine NMR for 3d.....</b>        | <b>S16</b> |
| <b>Figure S15. Fluorescent spectra for 3d.....</b> | <b>S16</b> |
| <b>Figure S16. Proton NMR for 3e.....</b>          | <b>S17</b> |
| <b>Figure S17. Carbon NMR for 3e.....</b>          | <b>S18</b> |
| <b>Figure S18. Fluorescent spectra for 3e.....</b> | <b>S18</b> |
| <b>Figure S19. Proton NMR for 3f.....</b>          | <b>S19</b> |
| <b>Figure S20. Carbon NMR for 3f.....</b>          | <b>S20</b> |
| <b>Figure S21. Fluorescent spectra for 3f.....</b> | <b>S20</b> |
| <b>Figure S22. Proton NMR for 3g.....</b>          | <b>S21</b> |
| <b>Figure S23. Carbon NMR for 3g.....</b>          | <b>S22</b> |
| <b>Figure S24. Fluorescent spectra for 3g.....</b> | <b>S22</b> |
| <b>Figure S25. Proton NMR for 3h.....</b>          | <b>S23</b> |
| <b>Figure S26. Carbon NMR for 3h.....</b>          | <b>S24</b> |
| <b>Figure S27. Fluorescent spectra for 3h.....</b> | <b>S24</b> |
| <b>Figure S28. Proton NMR for 3i.....</b>          | <b>S25</b> |
| <b>Figure S29. Carbon NMR for 3i.....</b>          | <b>S26</b> |
| <b>Figure S30. Fluorescent spectra for 3i.....</b> | <b>S26</b> |
| <b>Figure S31. Proton NMR for 3j.....</b>          | <b>S27</b> |
| <b>Figure S32. Carbon NMR for 3j.....</b>          | <b>S28</b> |
| <b>Figure S33. Fluorescent spectra for 3j.....</b> | <b>S28</b> |
| <b>Figure S34. Proton NMR for 3k.....</b>          | <b>S29</b> |
| <b>Figure S35. Carbon NMR for 3k.....</b>          | <b>S30</b> |
| <b>Figure S36. Fluorescent spectra for 3k.....</b> | <b>S30</b> |
| <b>Figure S37. Proton NMR for 3l.....</b>          | <b>S31</b> |

|                                                      |            |
|------------------------------------------------------|------------|
| <b>Figure S38. Carbon NMR for 3l.....</b>            | <b>S32</b> |
| <b>Figure S39. Fluorescent spectra for 3l.....</b>   | <b>S32</b> |
| <b>Figure S40. Proton NMR for 3m.....</b>            | <b>S33</b> |
| <b>Figure S41. Carbon NMR for 3m.....</b>            | <b>S34</b> |
| <b>Figure S42. Fluorescent spectra for 3m.....</b>   | <b>S34</b> |
| <b>Figure S43. Proton NMR for 3n.....</b>            | <b>S35</b> |
| <b>Figure S44. Carbon NMR for 3n.....</b>            | <b>S36</b> |
| <b>Figure S45. Fluorescent spectra for 3n.....</b>   | <b>S36</b> |
| <b>Figure S46. Proton NMR for 3o.....</b>            | <b>S37</b> |
| <b>Figure S47. Carbon NMR for 3o.....</b>            | <b>S38</b> |
| <b>Figure S48. Fluorescent spectra for 3o.....</b>   | <b>S38</b> |
| <b>III. Hammett Plot of ANS derivatives.....</b>     | <b>S39</b> |
| <b>Figure S49. Hammett Plot for ANS derivatives.</b> |            |
| <b>IV. References.....</b>                           | <b>S39</b> |

## I. Method optimization

Scheme S1

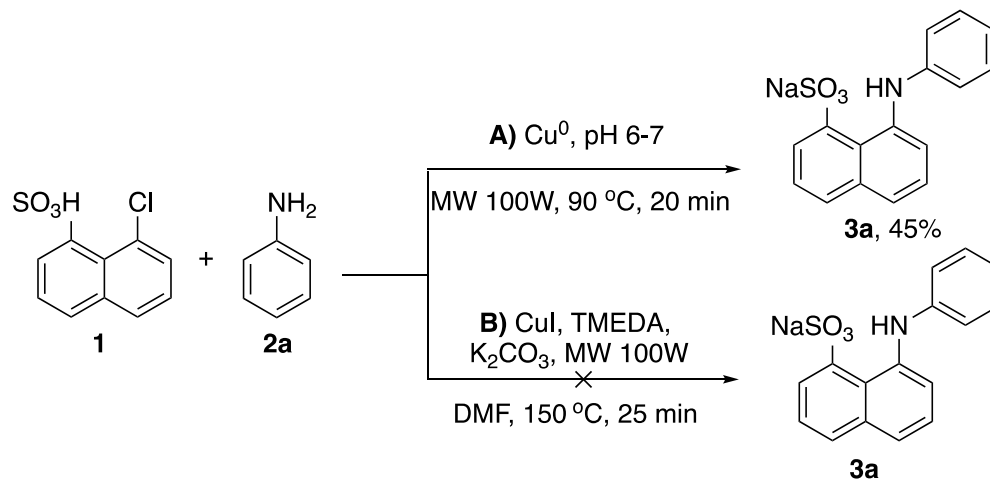

We initially investigated two Ullman coupling conditions for reacting 8-chloronaphthalene-1-sulfonic acid with aniline (Scheme S1 and Table S1).

**Method A:**<sup>1-3</sup> To 8-chloronaphthalene-1-sulfonic acid (**1**, 1 equiv), elemental copper (cat. amount), and aniline (**2a**, 2 equiv) in  $\text{H}_2\text{O}$ , were added  $\text{NaH}_2\text{PO}_4$  and  $\text{Na}_2\text{HPO}_4$  to adjust the pH to 6-7. Then the reaction was conducted under microwave conditions at 90 °C for 20 min.

**Method B:**<sup>4, 5</sup> To **1** (1 equiv) in DMF, were added tetramethylethylenediamine (TMEDA, cat. amount), CuI (cat. amount),  $\text{K}_2\text{CO}_3$  (1.5 equiv) and aniline (2 equiv). Then the reaction was conducted under microwave conditions at 150 °C for 25 min.

Method A resulted in a 45% isolated yield of **3a** and no product was obtained from method B. Therefore, we next optimized method A by screening copper catalysts, the amount of aniline, reaction time, and temperature (summarized in the table below). The optimized conditions are as follows: reaction in the presence of **1** (0.41 mmol, 1 equiv), **2a** (0.46 mmol, 1.1 equiv) and a catalytic amount copper element (10 mol%) in a buffer solution (pH 6-7) of  $\text{Na}_2\text{HPO}_4$  (pH 9.6) and  $\text{NaH}_2\text{PO}_4$  (pH 4.2) for 1 h at 100 °C under microwave (100 W) conditions, through which the yield of **3a** was improved to 63%.

**Table S1. Reaction optimization**

Clc1ccc(S(=O)(=O)O)cc1 (**1**) + Nc1ccccc1 (**2a**)
   
 1) Catalyst, pH 6-7  
 MW, Temp  
 2) NaOH adjust pH > 12
   
Nc1ccc(S(=O)(=O)[O-])cc1 (**3a,b**)

| Entry | Catalyst (mol %)     | Equiv of aniline | Temp (° C) | Reaction time | Yield (%) <sup>b</sup> |
|-------|----------------------|------------------|------------|---------------|------------------------|
| 1     | CuI (10)             | 1.1              | 80         | 1 h           | trace                  |
| 2     | CuCl (10)            | 1.1              | 80         | 1 h           | trace                  |
| 3     | Cu <sup>0</sup> (10) | 1.1              | 80         | 1 h           | 47                     |
| 4     | Cu <sup>0</sup> (15) | 1.1              | 80         | 1 h           | 47                     |
| 5     | Cu <sup>0</sup> (10) | 2                | 80         | 1 h           | 47                     |
| 7     | Cu <sup>0</sup> (10) | 1.1              | 100        | 1 h           | 53                     |
| 8     | Cu <sup>0</sup> (10) | 1.1              | 120        | 1 h           | 52                     |
| 10    | Cu <sup>0</sup> (10) | 1.1              | 100        | 1.5 h         | 63                     |
| 11    | Cu <sup>0</sup> (10) | 1.1              | 100        | 2 h           | 63                     |

<sup>a</sup>Reaction was carried out in 5 ml sealed microwave tube. **1** (0.41 mmol, 1 equiv), **2a** and catalyst were added into a buffer solution (pH 6-7) of Na<sub>2</sub>HPO<sub>4</sub> and NaH<sub>2</sub>PO<sub>4</sub> and irradiated by microwave (100 W).

<sup>b</sup>Isolated yields.

## II. Spectra of analogs

Sodium 8-(Phenylamino)naphthalene-1-sulfonate (**3a**)

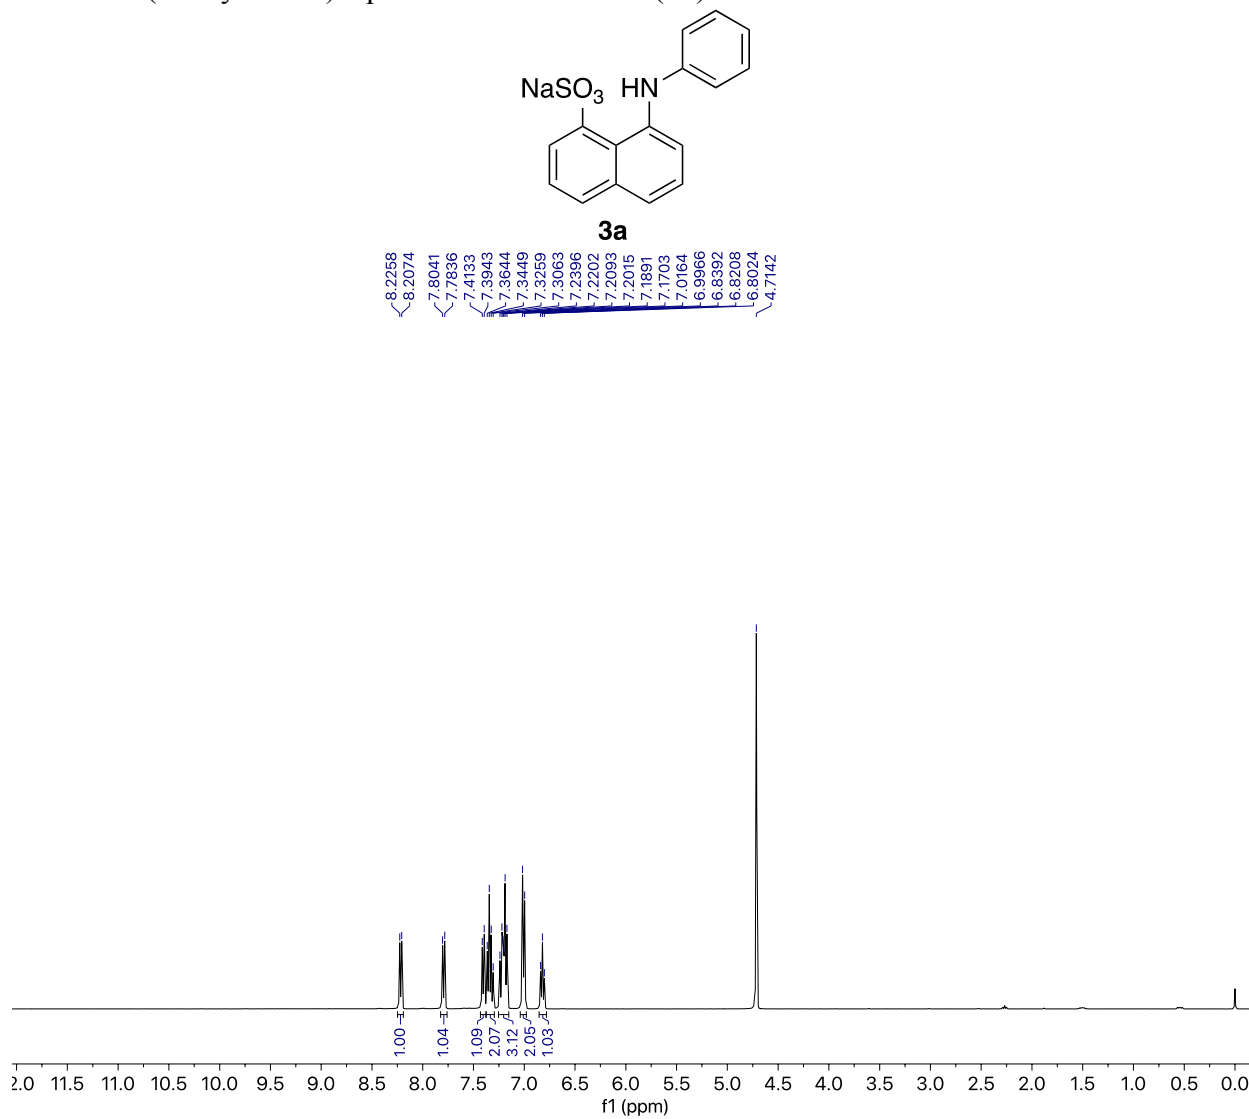

**Figure S1.** Proton NMR for **3a**.

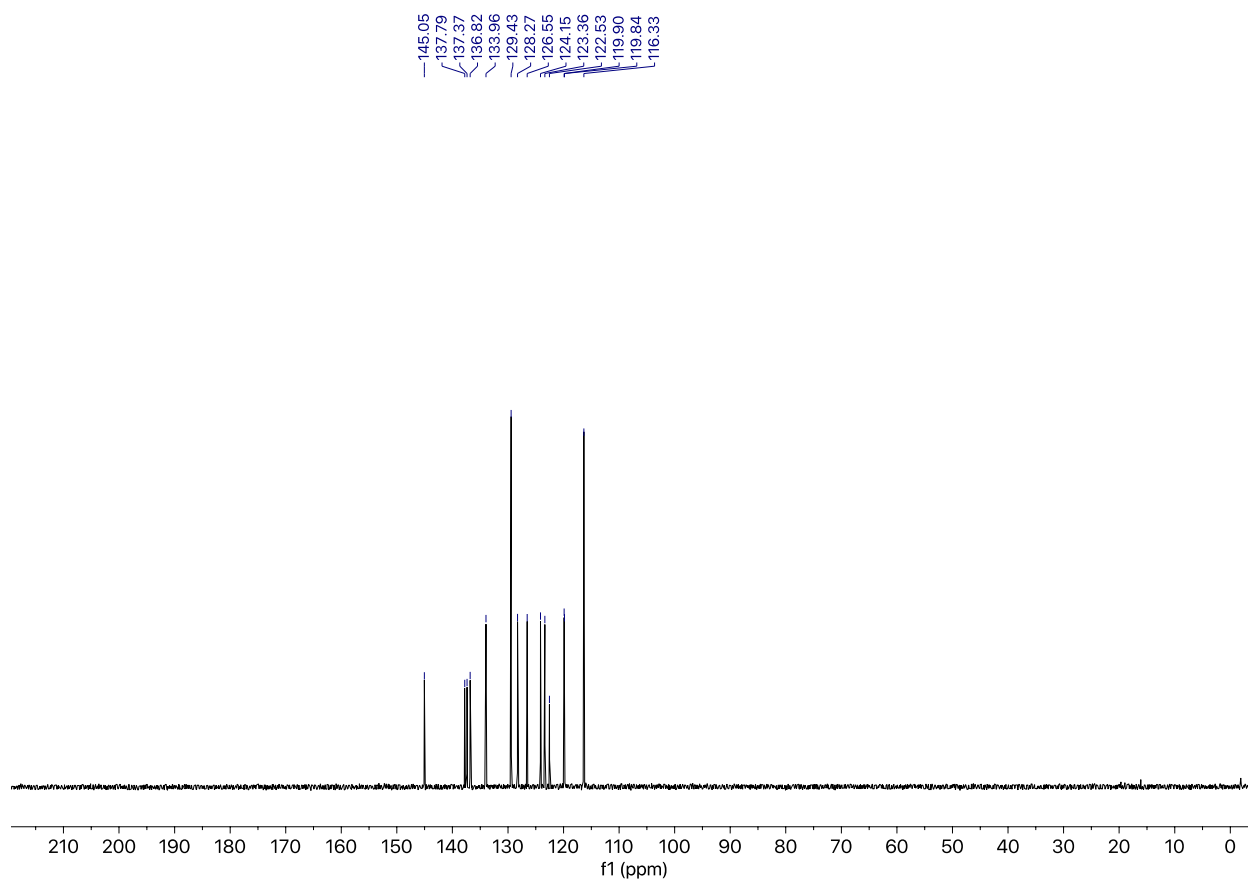

**Figure S2.** Carbon NMR for **3a**.

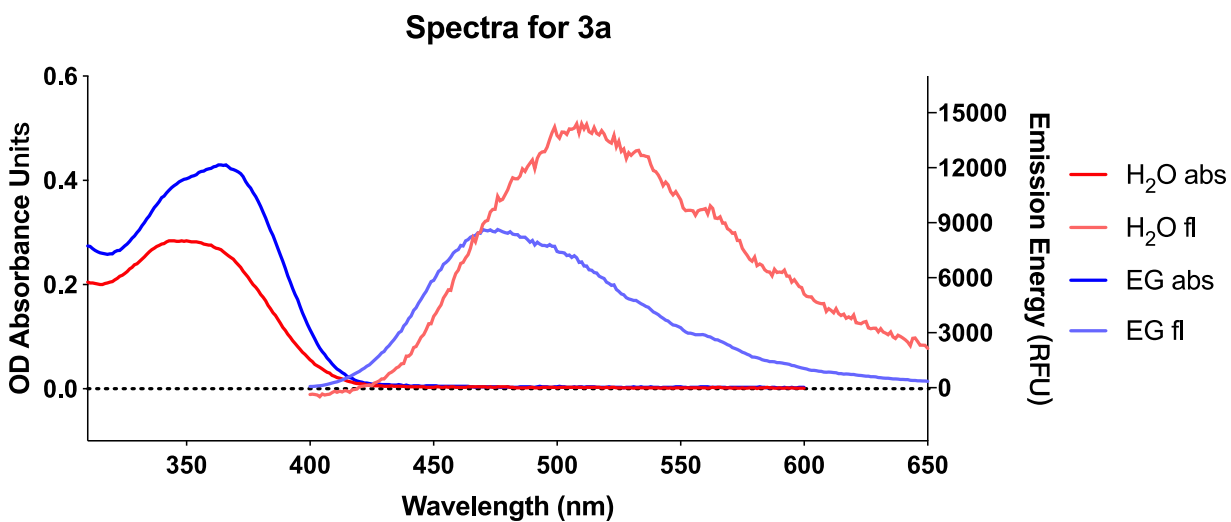

\*Fluorescence spectrum in ethylene glycol was taken at a lower gain to achieve an emission spectrum within the measurement parameters of the instrument.

**Figure S3.** Fluorescent spectra for **3a**.

Sodium 8-((4-Fluorophenyl)amino)naphthalene-1-sulfonate (**3b**)

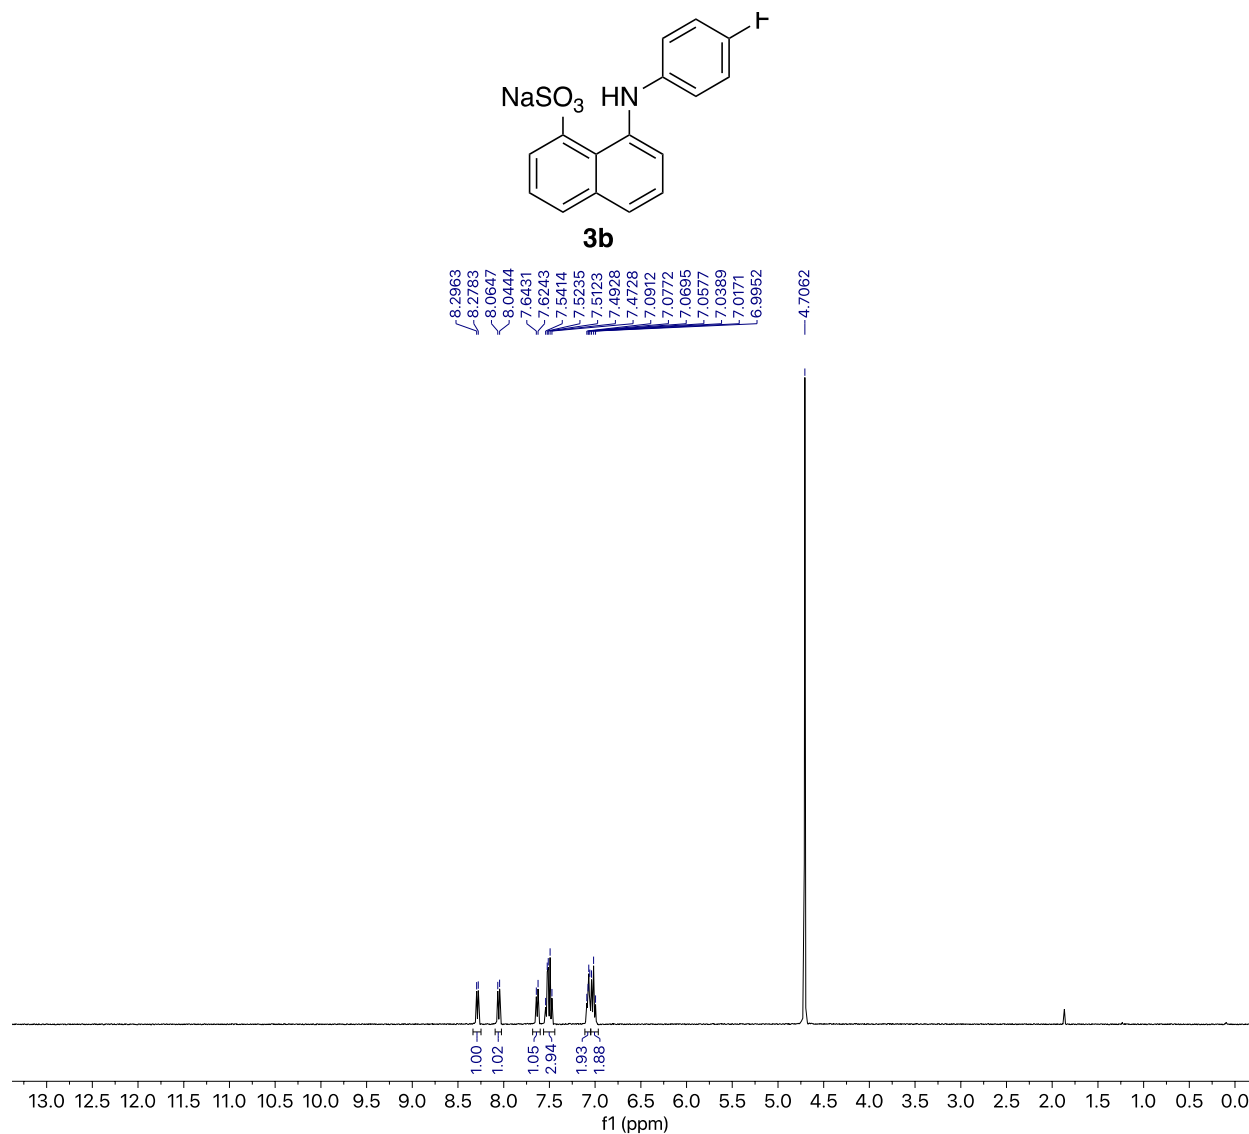

**Figure S4.** Proton NMR for **3b**.



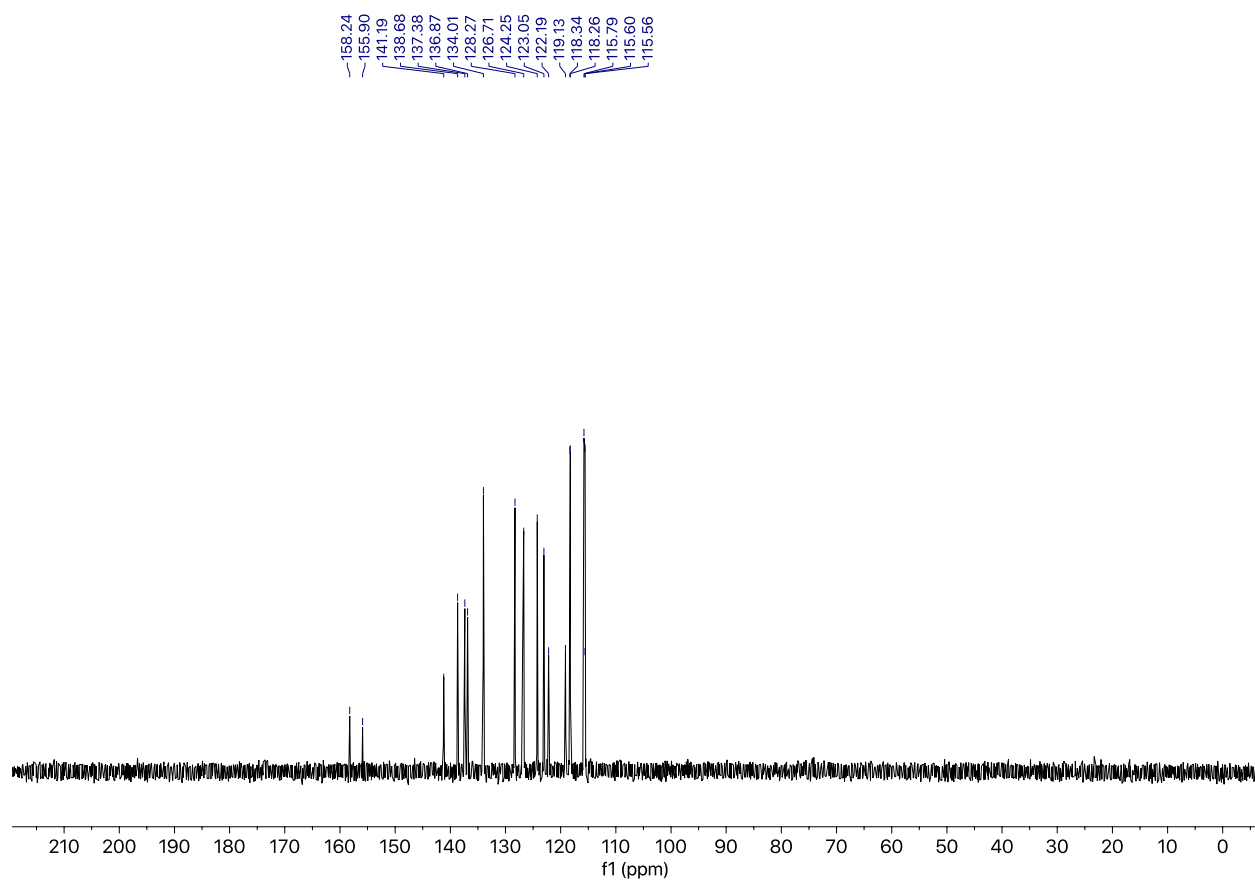

**Figure S5.** Carbon NMR for **3b**.

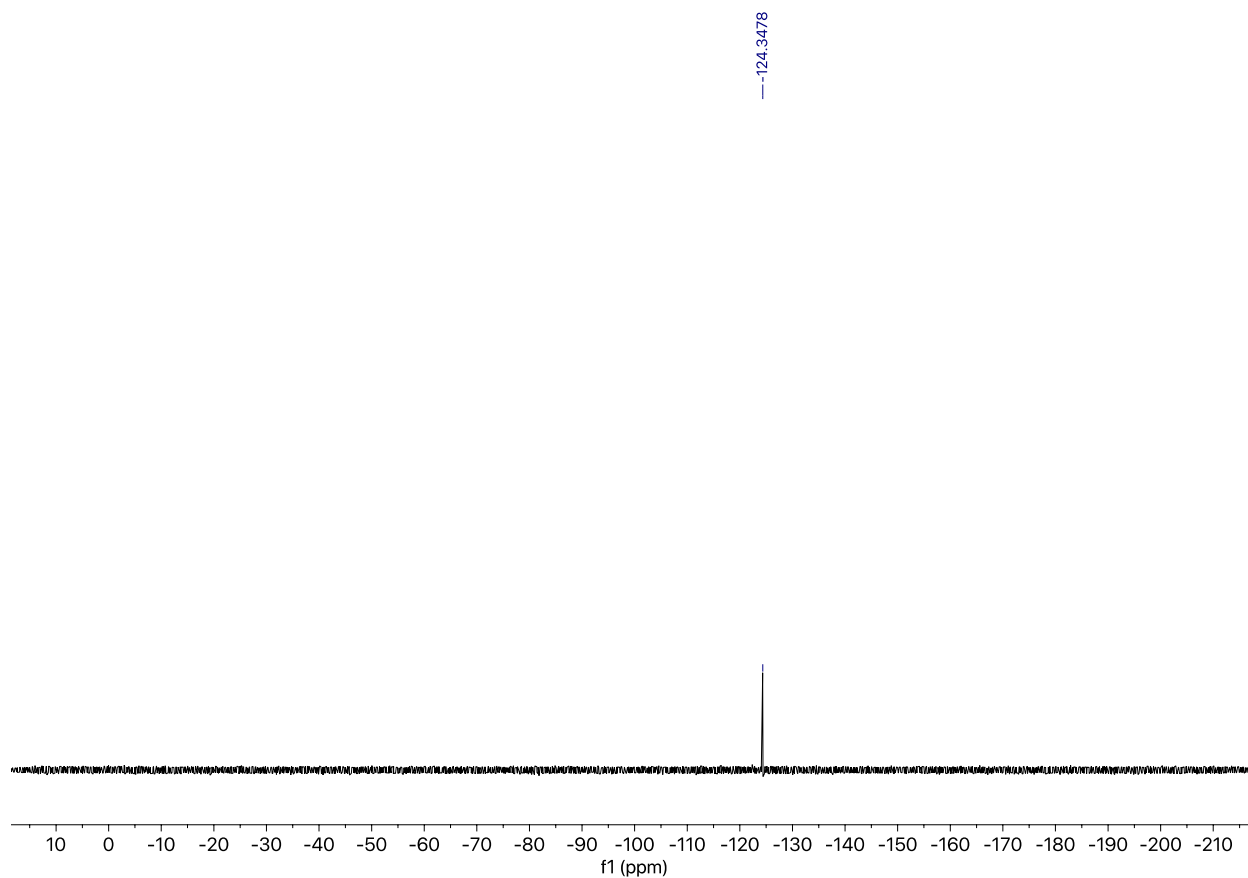

**Figure S6.** Fluorine NMR for **3b**.

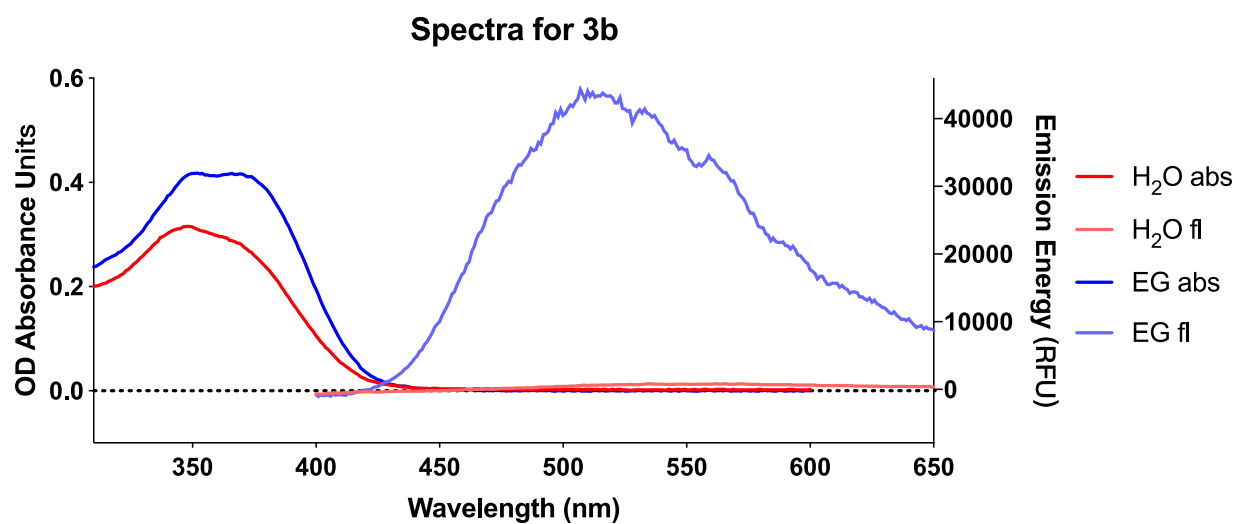

**Figure S7.** Fluorescent spectra for **3b**.

Sodium 8-((2-Fluorophenyl)amino)naphthalene-1-sulfonate (**3c**)

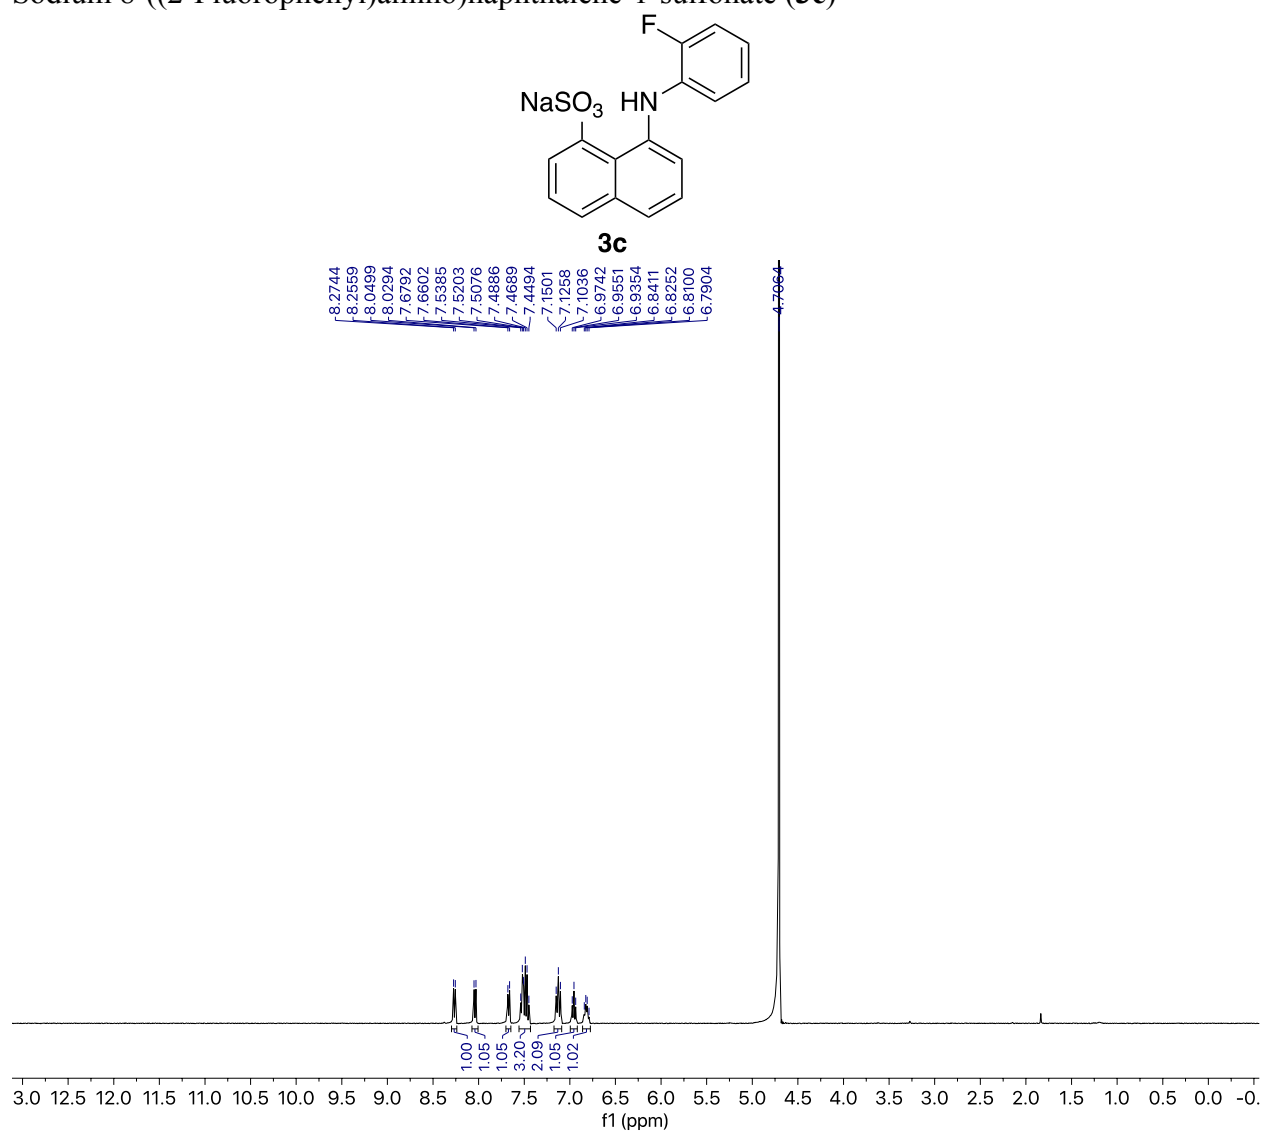

**Figure S8.** Proton NMR for **3c**.

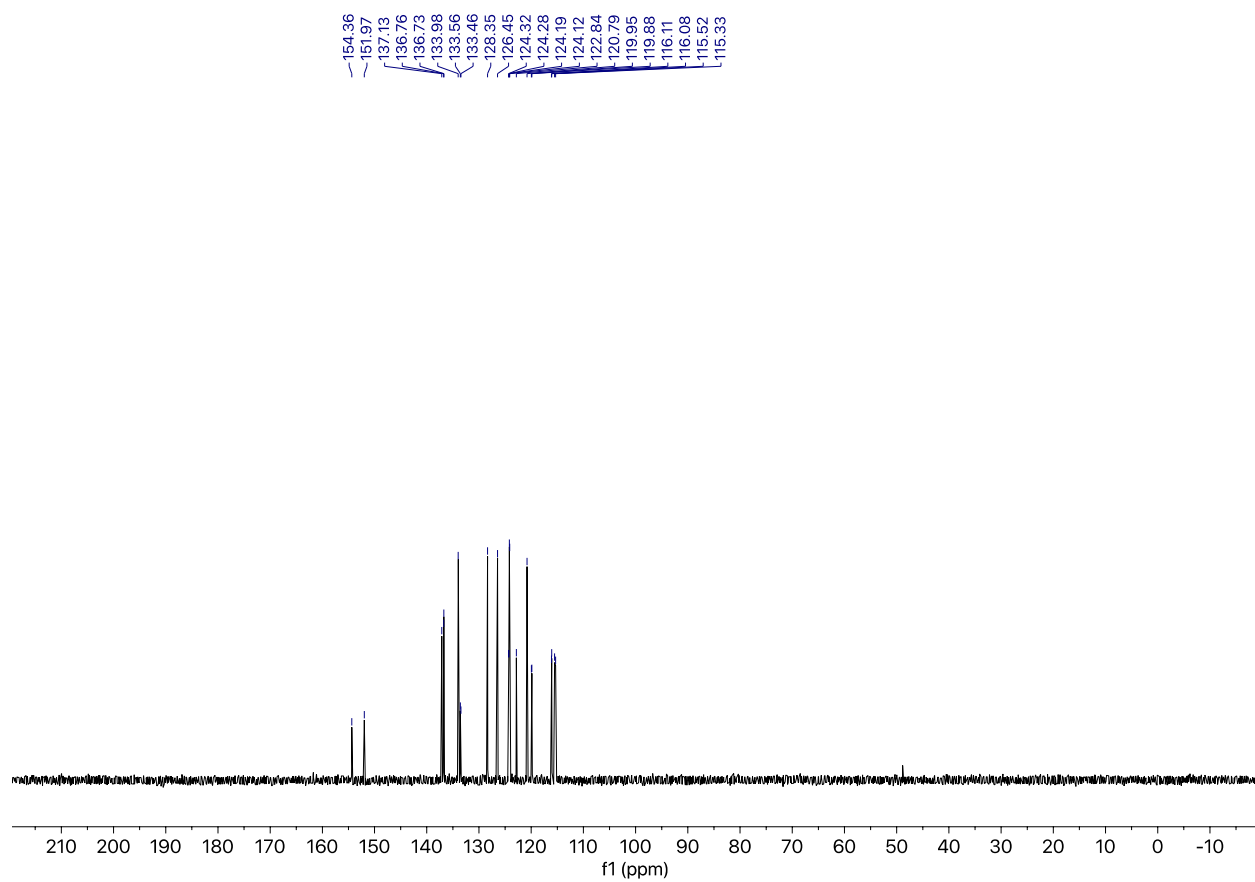

**Figure S9.** Carbon NMR for **3c**.

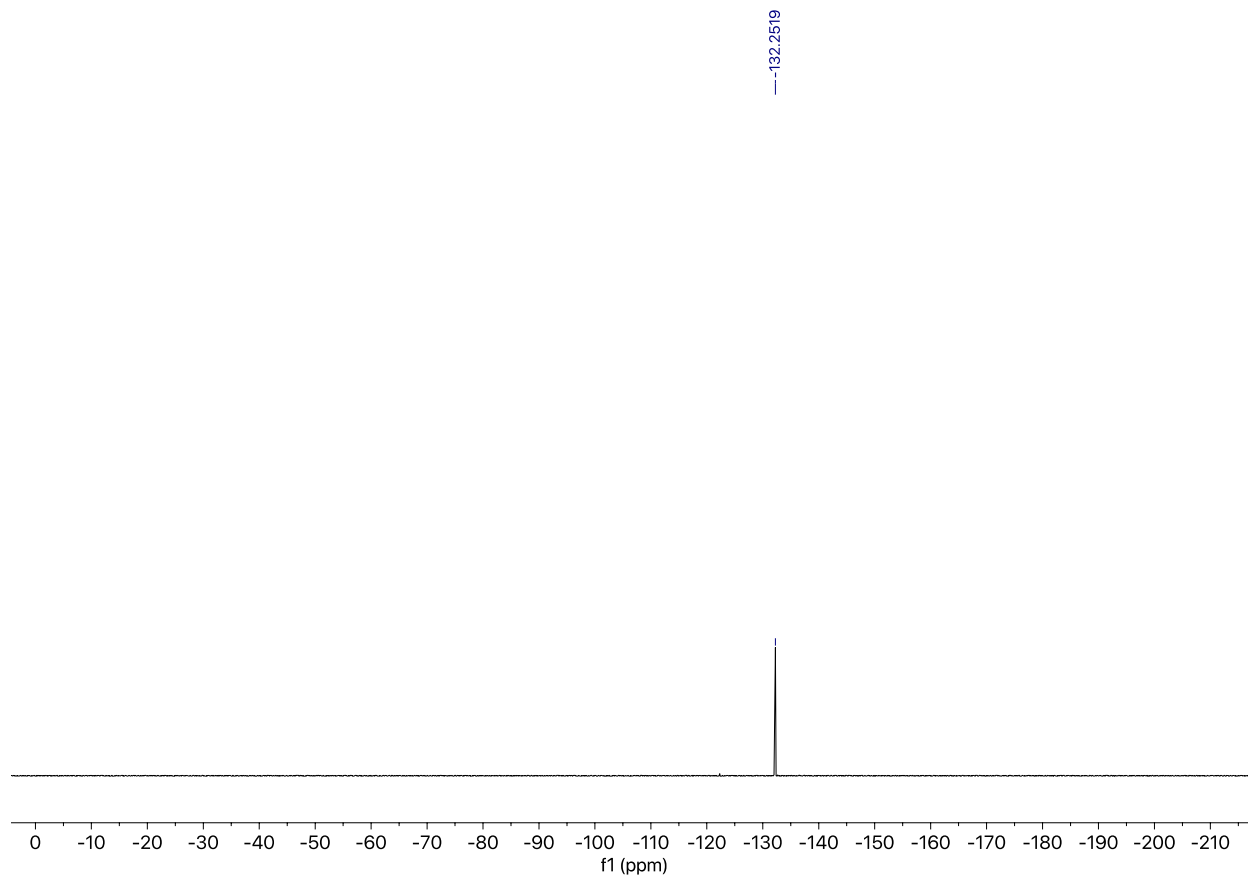

**Figure S10.** Fluorine NMR for **3c**.

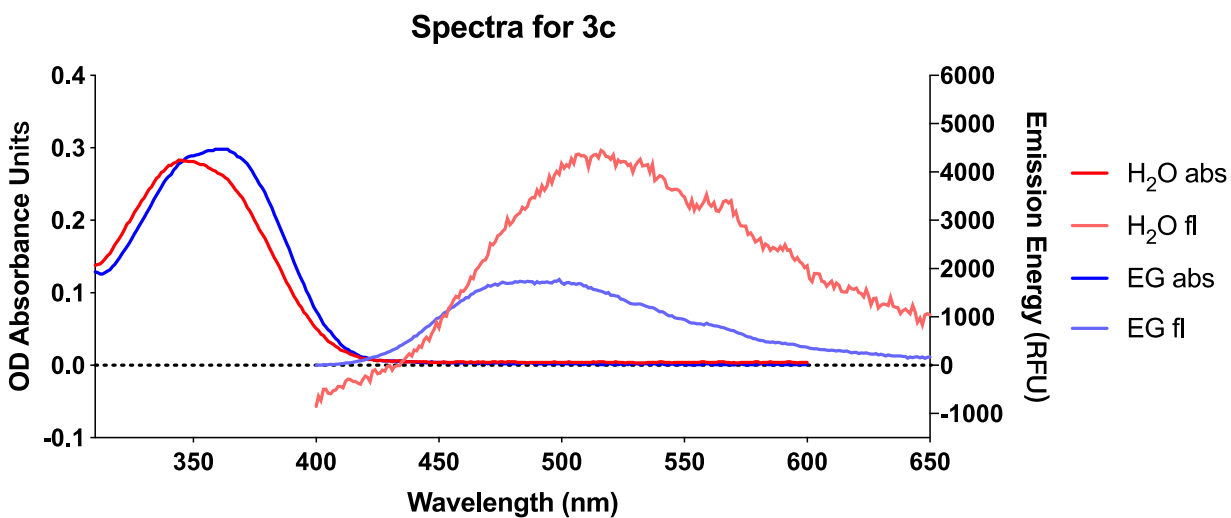

\*Fluorescence spectrum in ethylene glycol was taken at a lower gain to achieve an emission spectrum within the measurement parameters of the instrument.

**Figure S11.** Fluorescent spectra for **3c**.

Sodium 8-((3-Fluorophenyl)amino)naphthalene-1-sulfonate (**3d**)

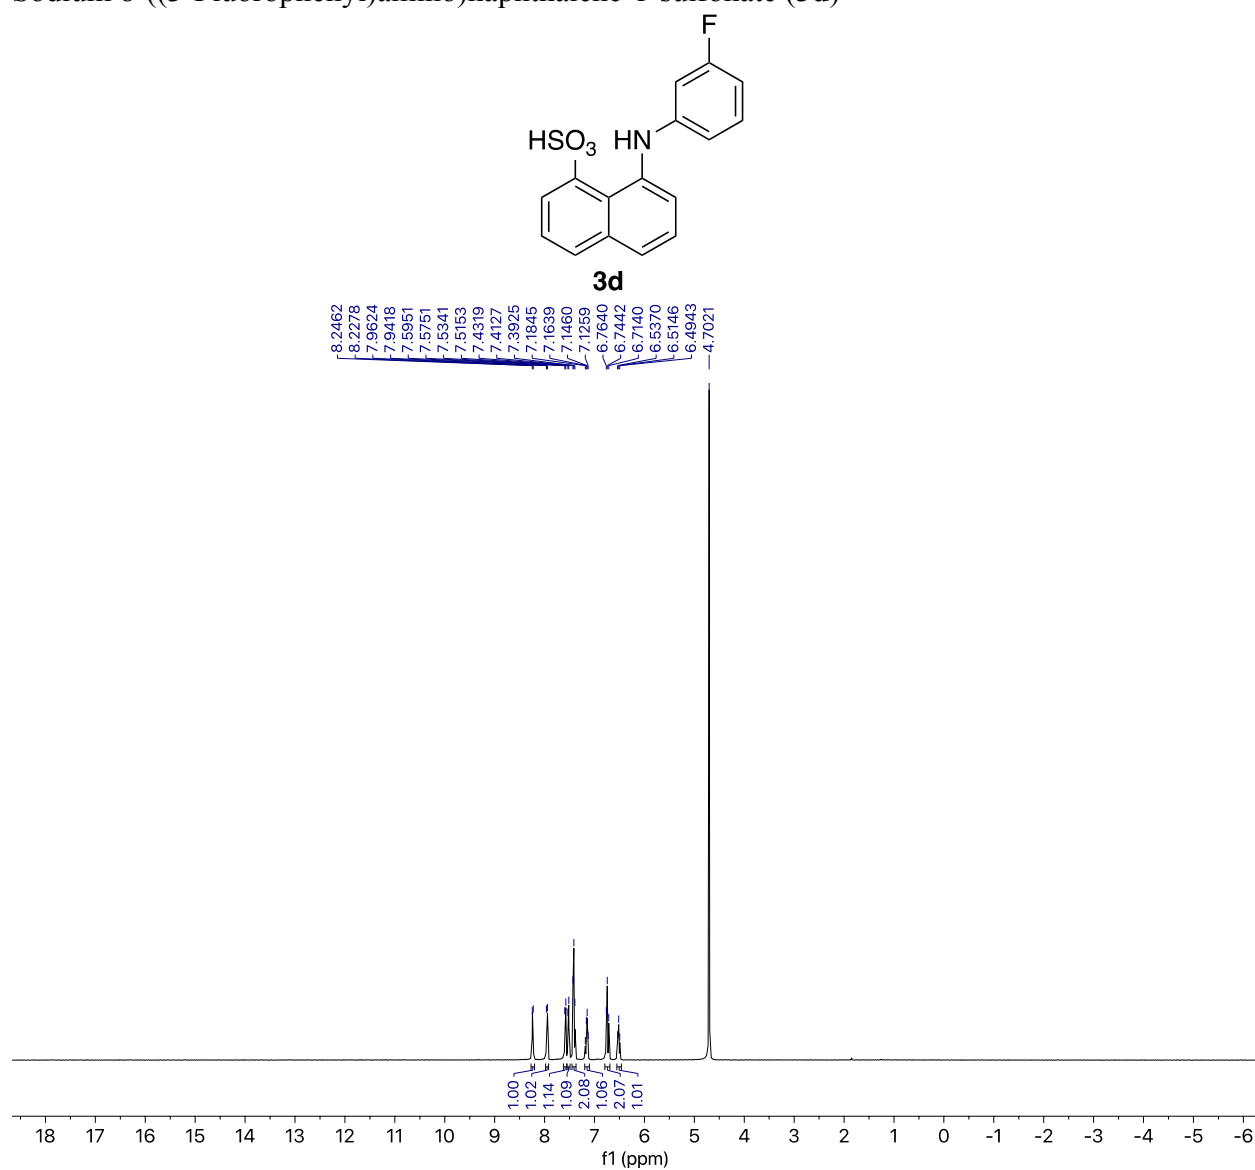

**Figure S12.** Proton NMR for **3d**.

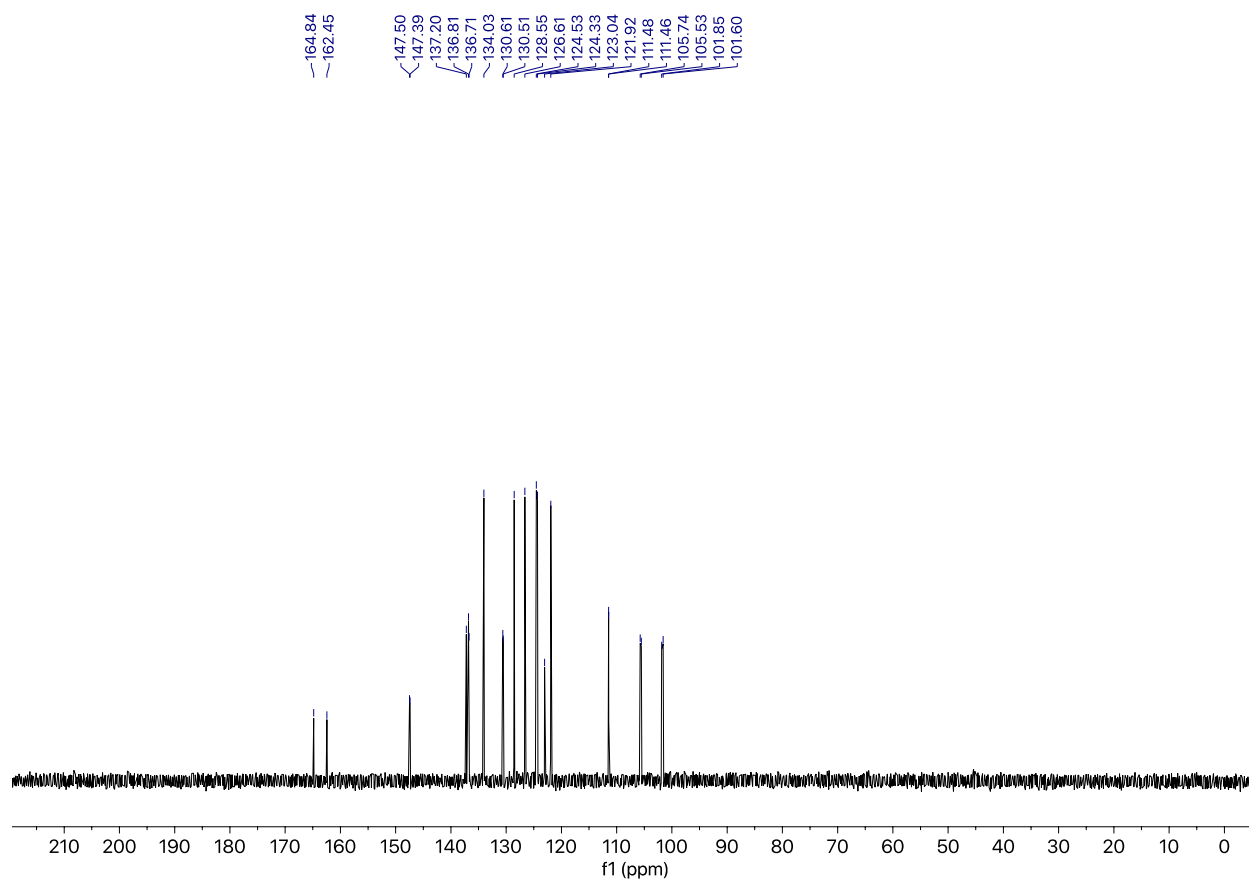

**Figure S13.** Carbon NMR for **3d**.

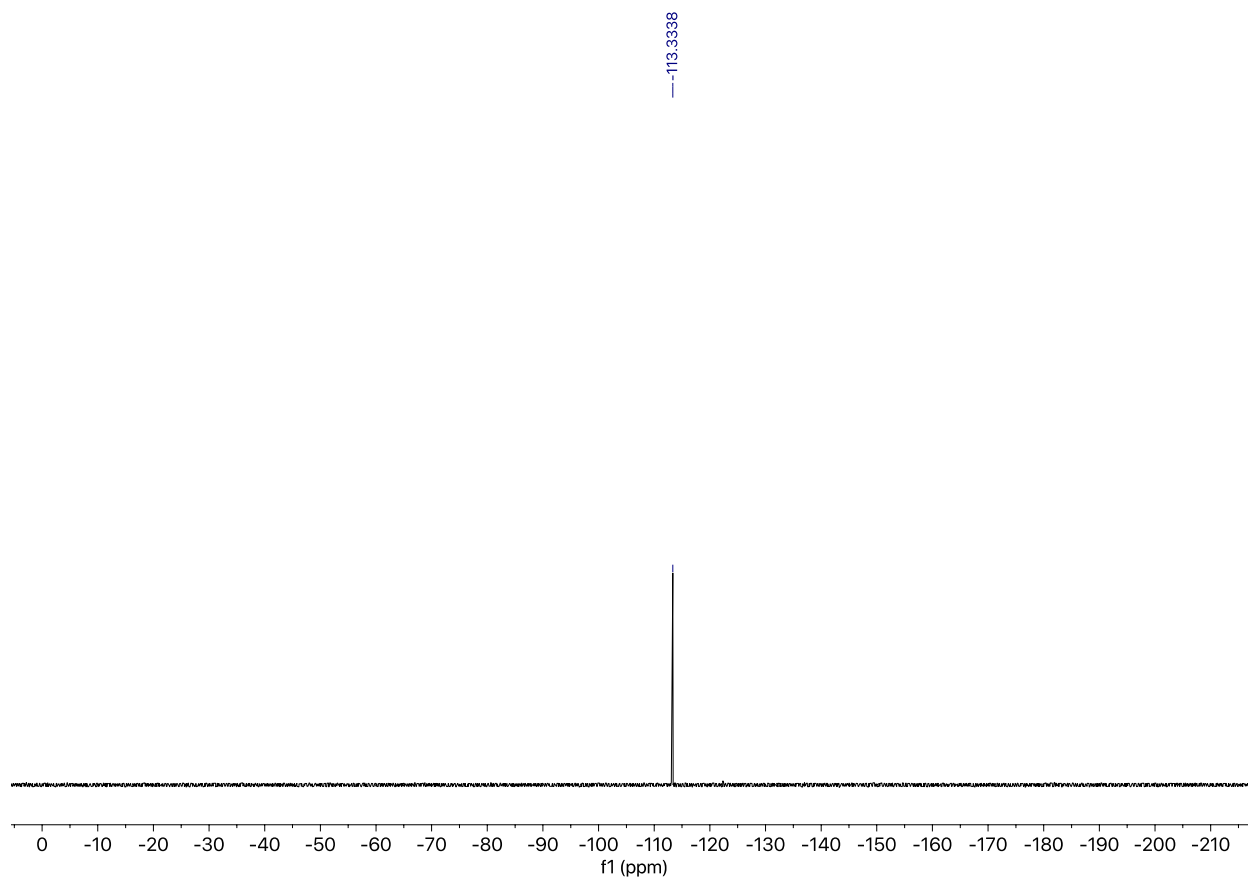

**Figure S14.** Fluorine NMR for **3d**.

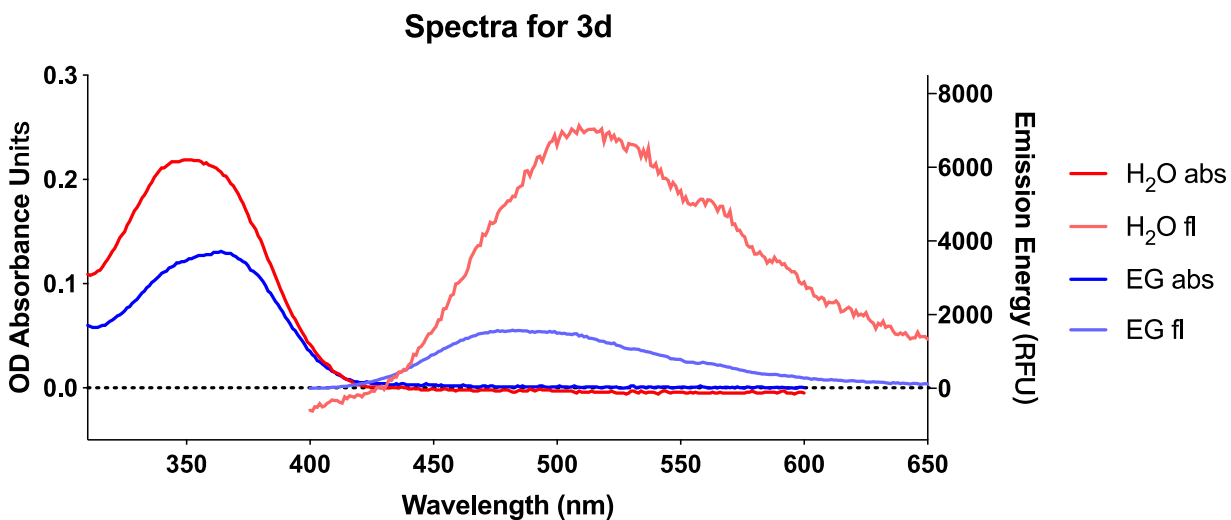

\*Fluorescence spectrum in ethylene glycol was taken at a lower gain to achieve an emission spectrum within the measurement parameters of the instrument.

**Figure S15.** Fluorescent spectra for **3d**.



Sodium 8-((3-Chlorophenyl)amino)naphthalene-1-sulfonate (**3e**)

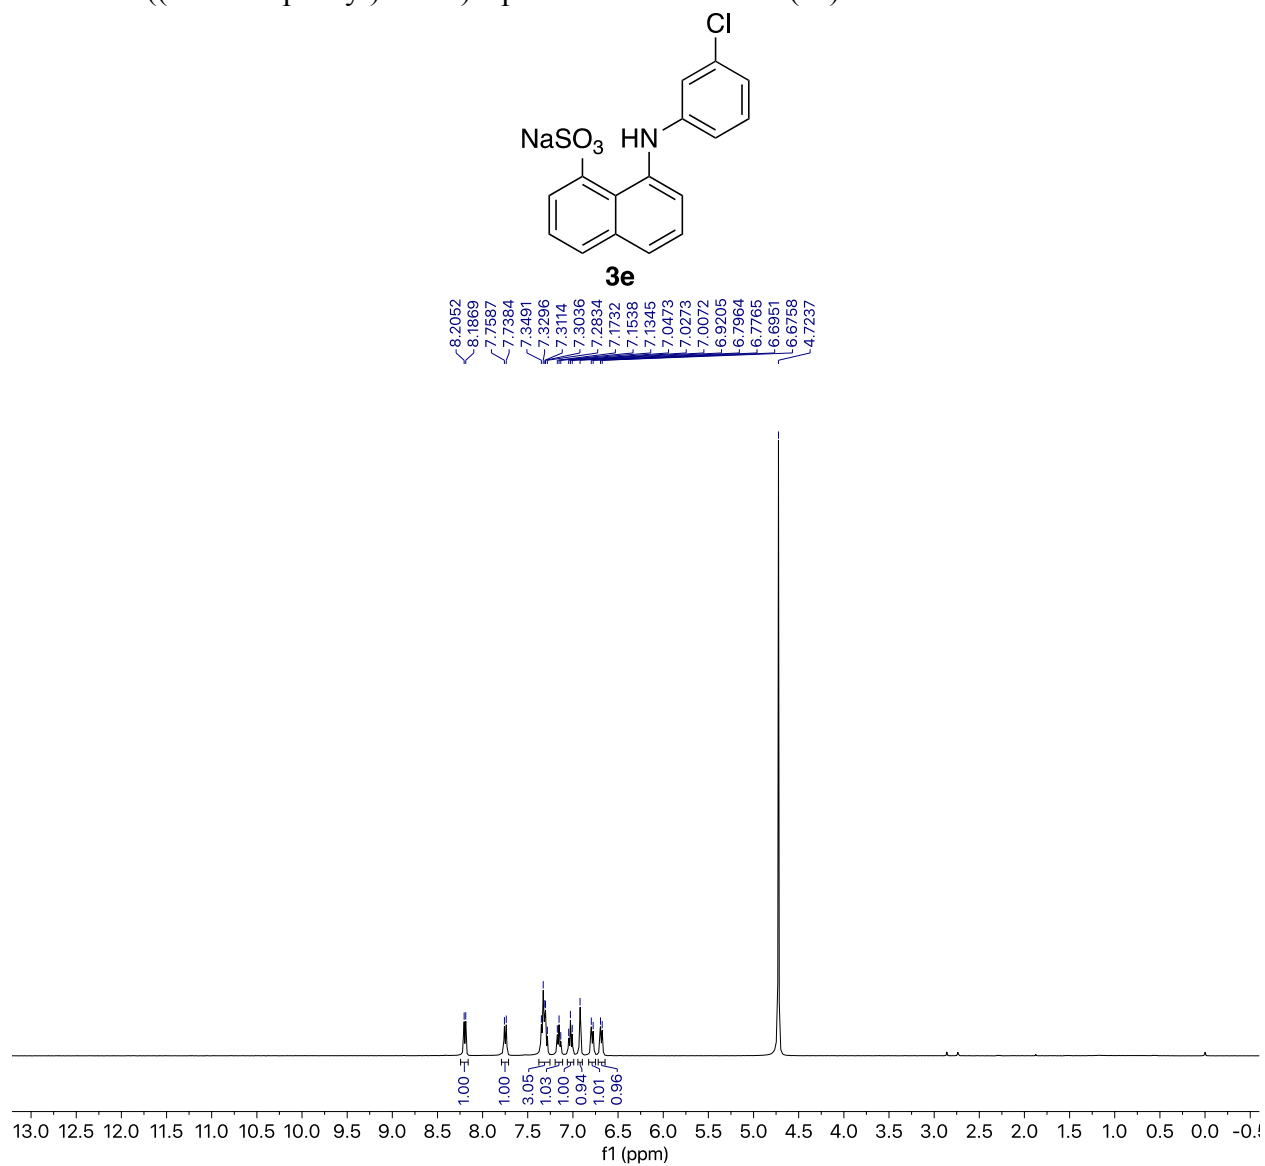

**Figure S16.** Proton NMR for **3e**.

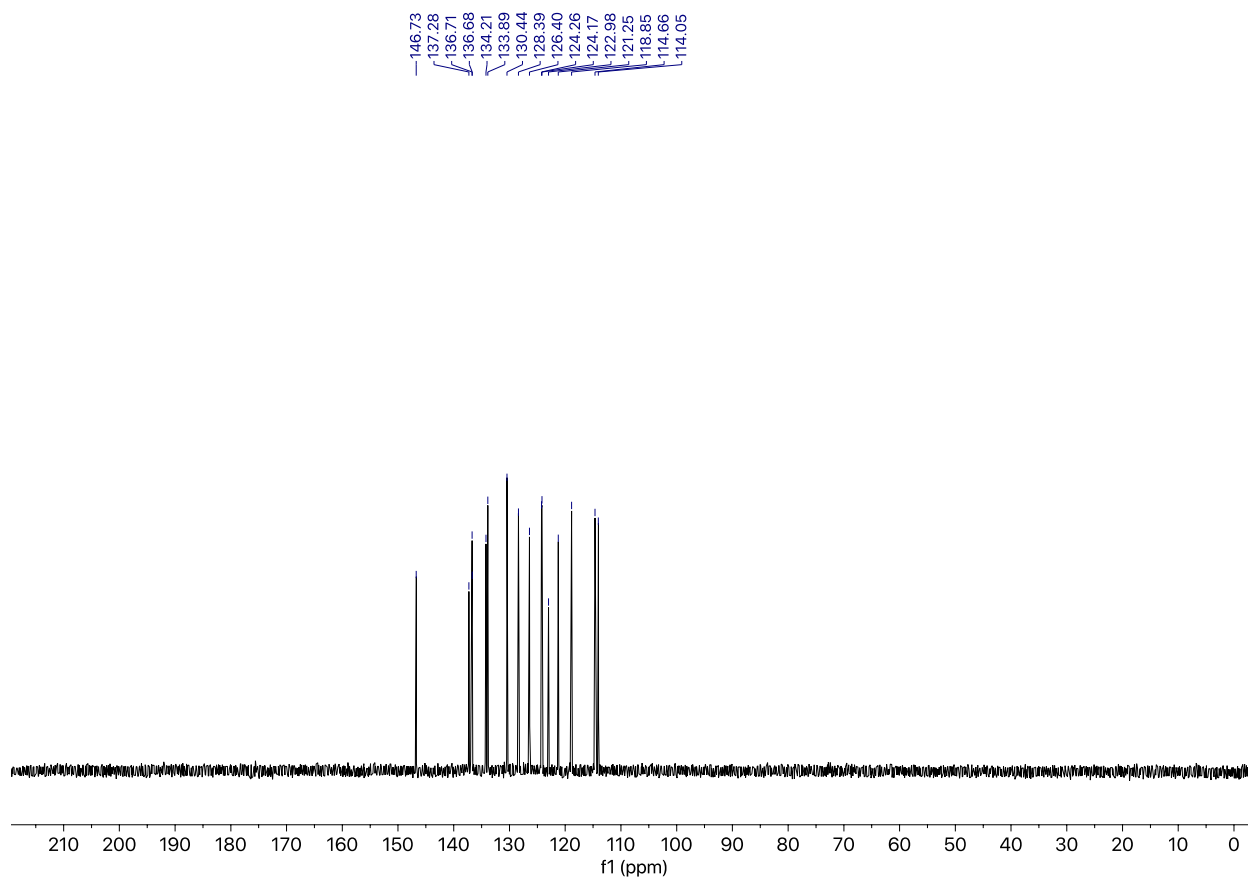

**Figure S17.** Carbon NMR for **3e**.

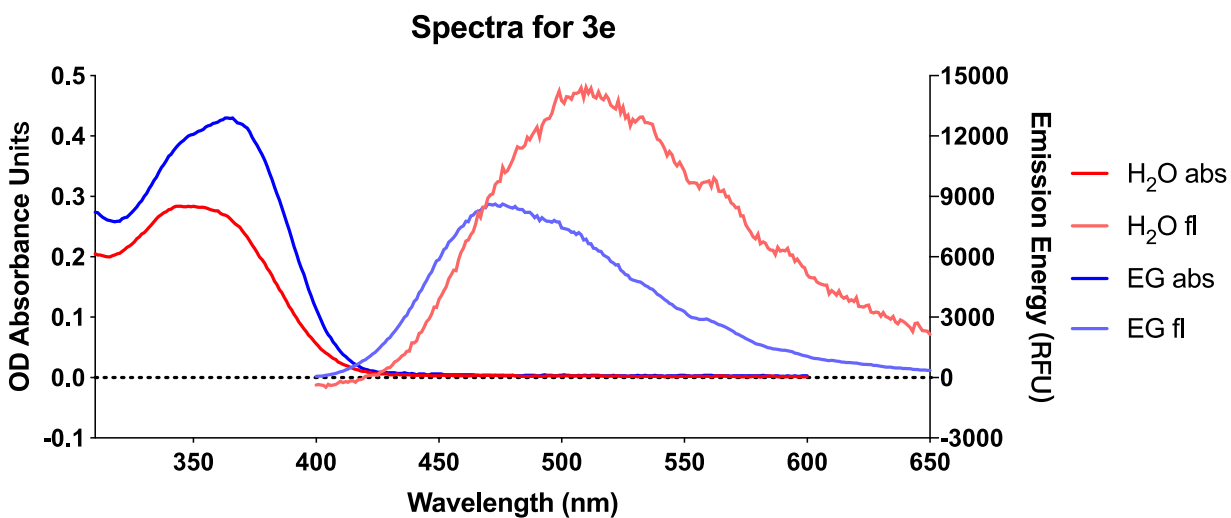

\*Fluorescence spectrum in ethylene glycol was taken at a lower gain to achieve an emission spectrum within the measurement parameters of the instrument.

**Figure S18.** Fluorescent spectra for **3e**.

Sodium 8-((4-Chlorophenyl)amino)naphthalene-1-sulfonate (**3f**)

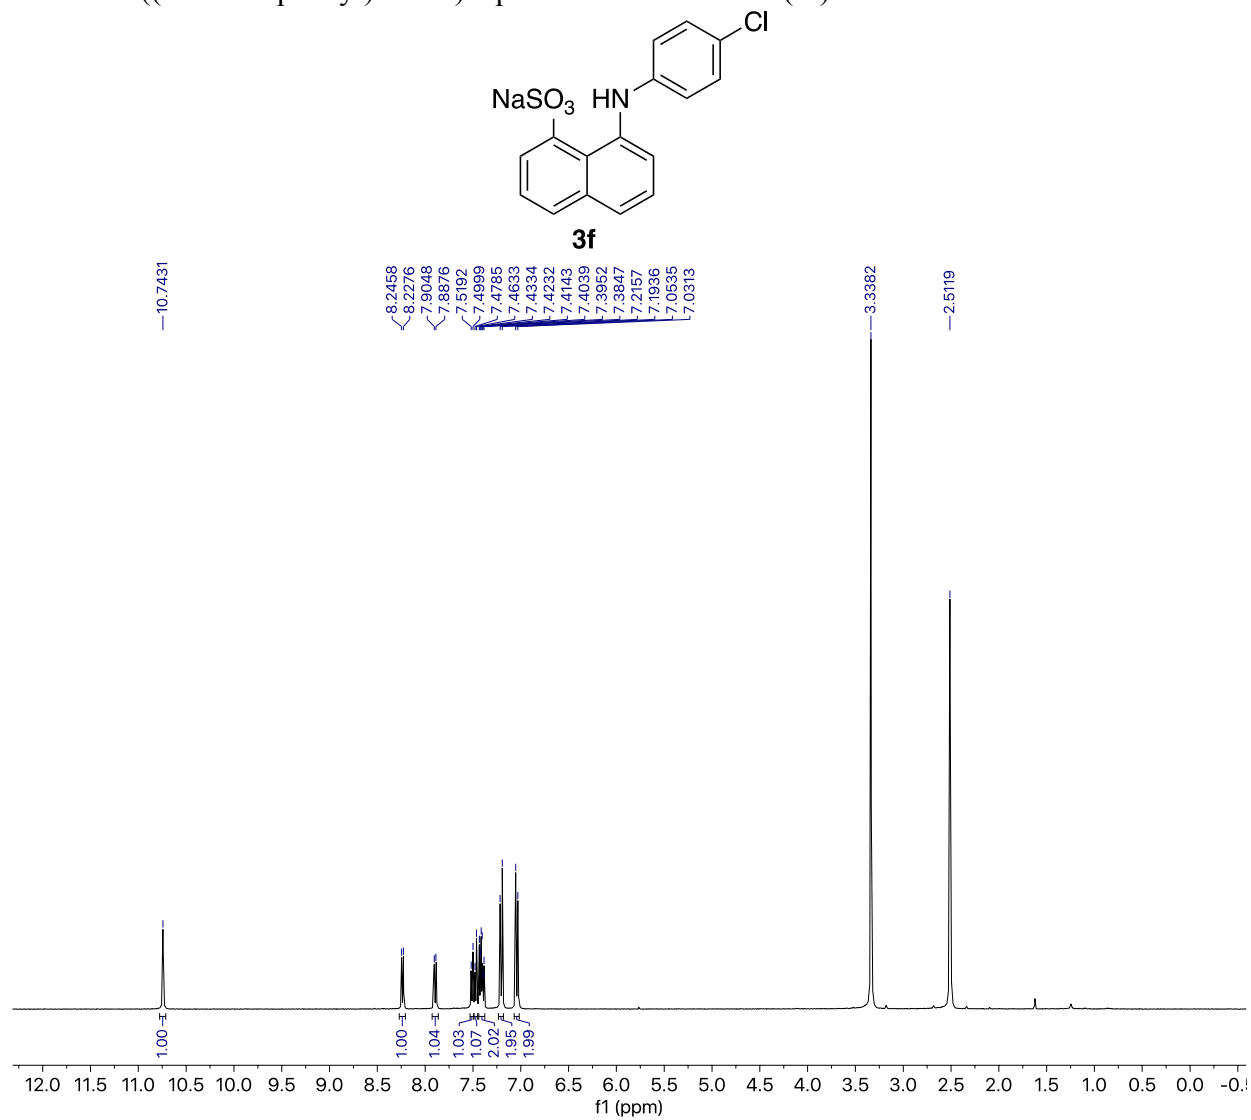

**Figure S19.** Proton NMR for **3f**.

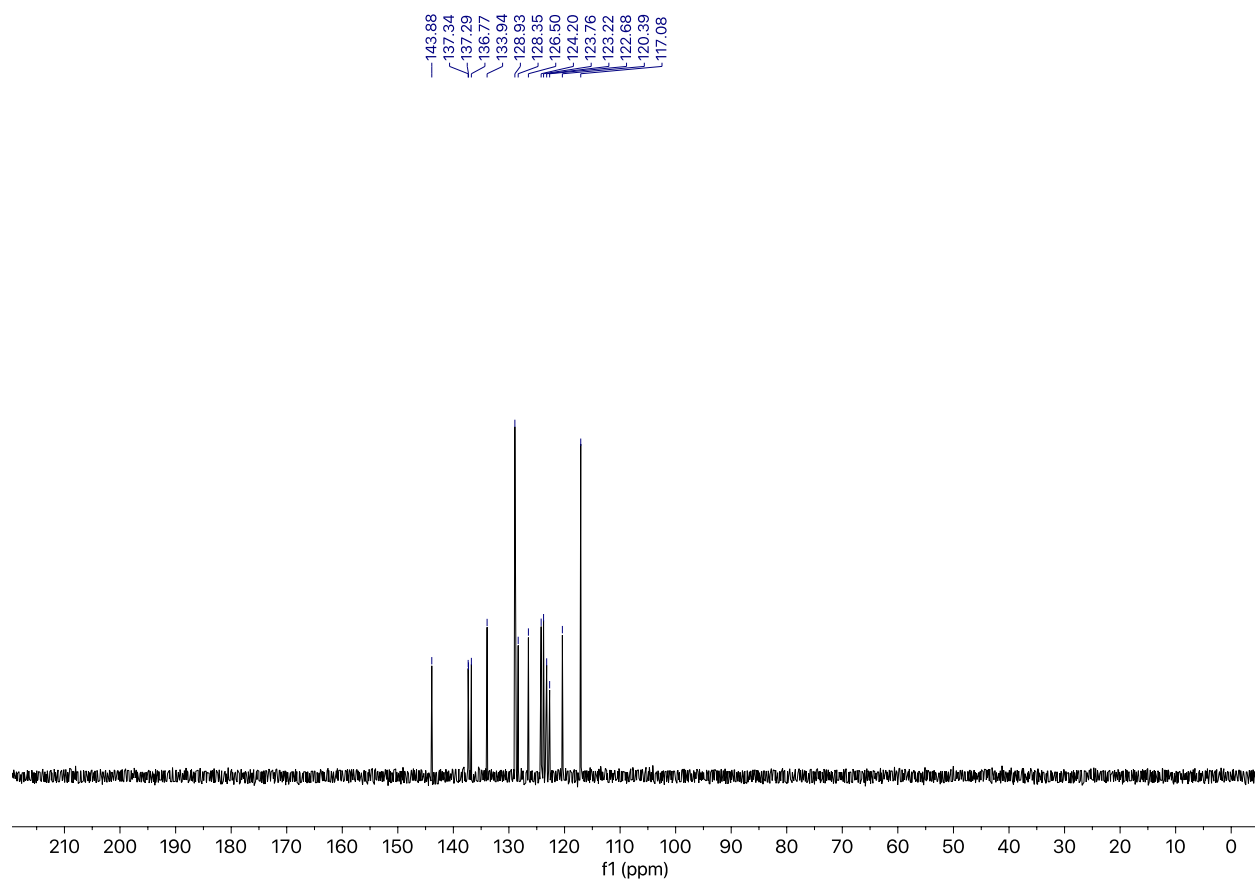

**Figure S20.** Carbon NMR for **3f**.

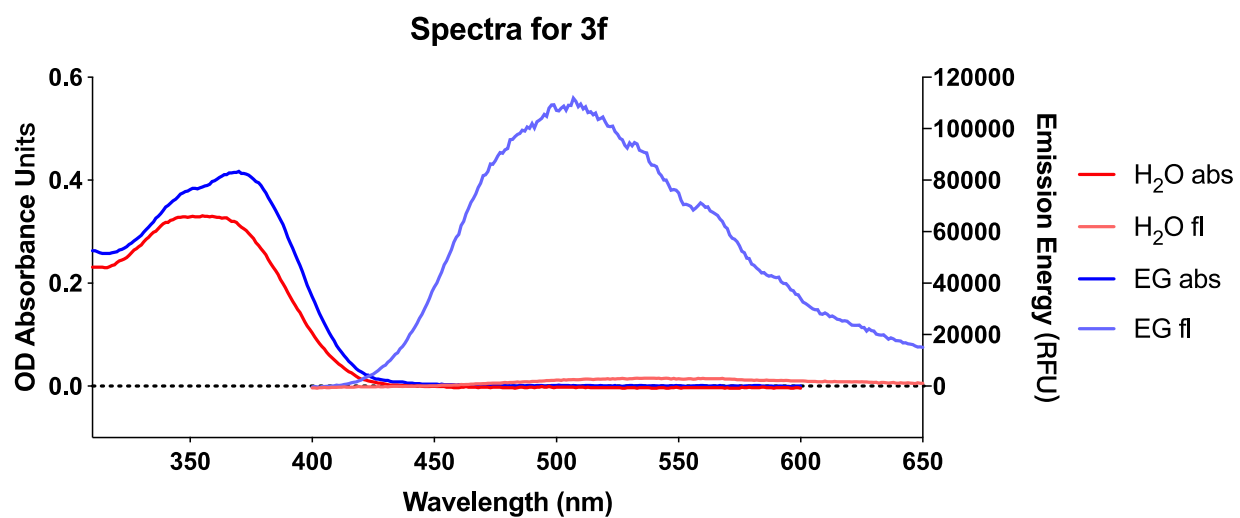

**Figure S21.** Fluorescent spectra for **3f**.

Sodium 8-((3,4-Dichlorophenyl)amino)naphthalene-1-sulfonate (**3g**)

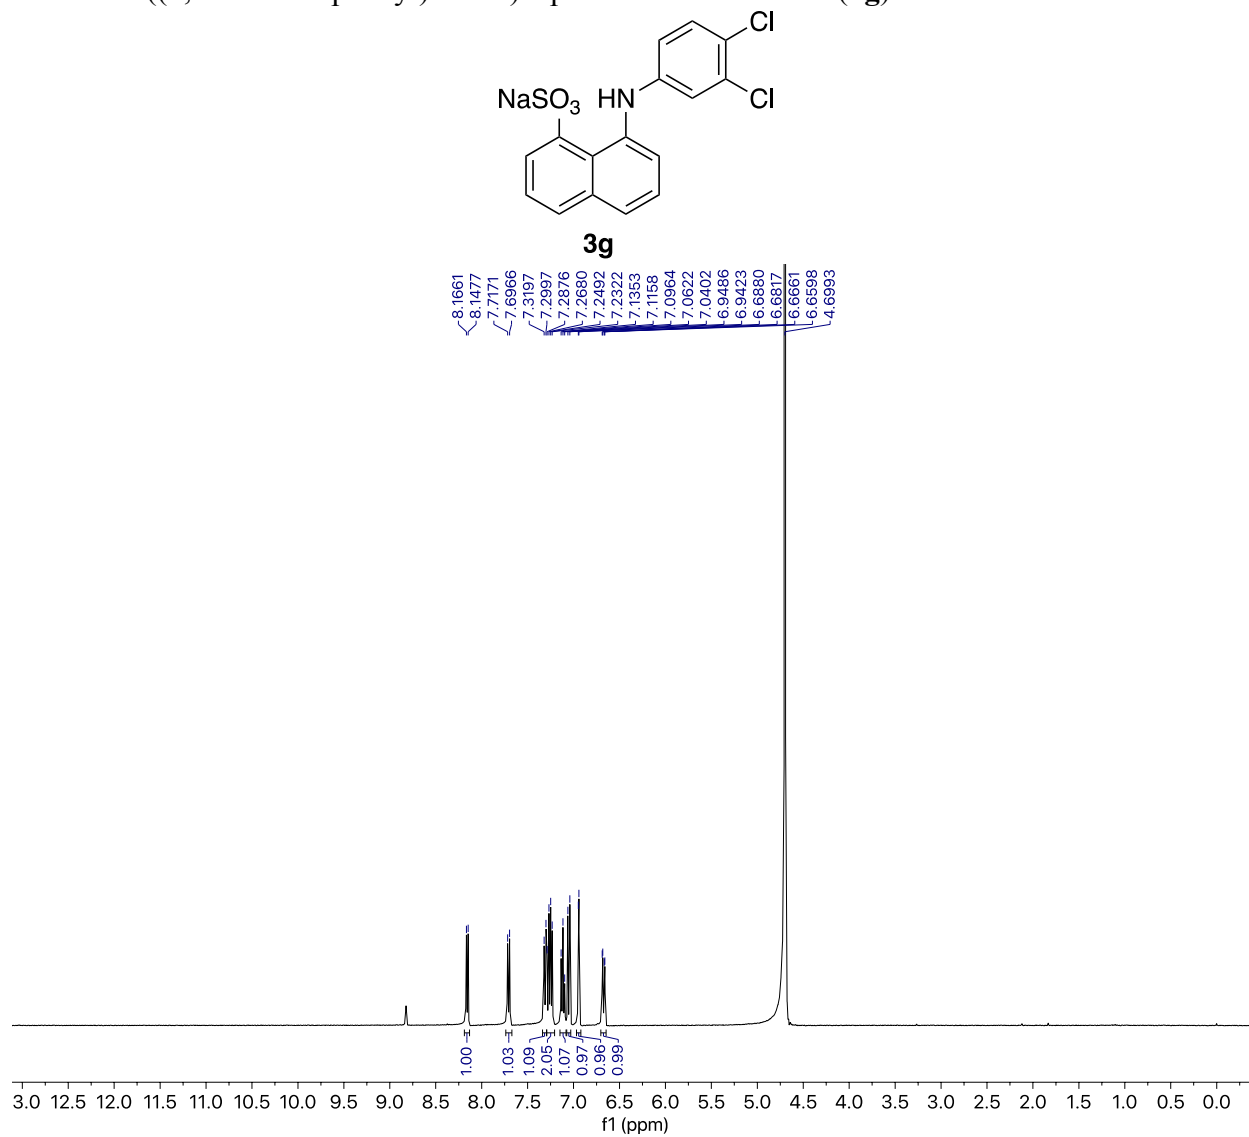

**Figure S22.** Proton NMR for **3g**.

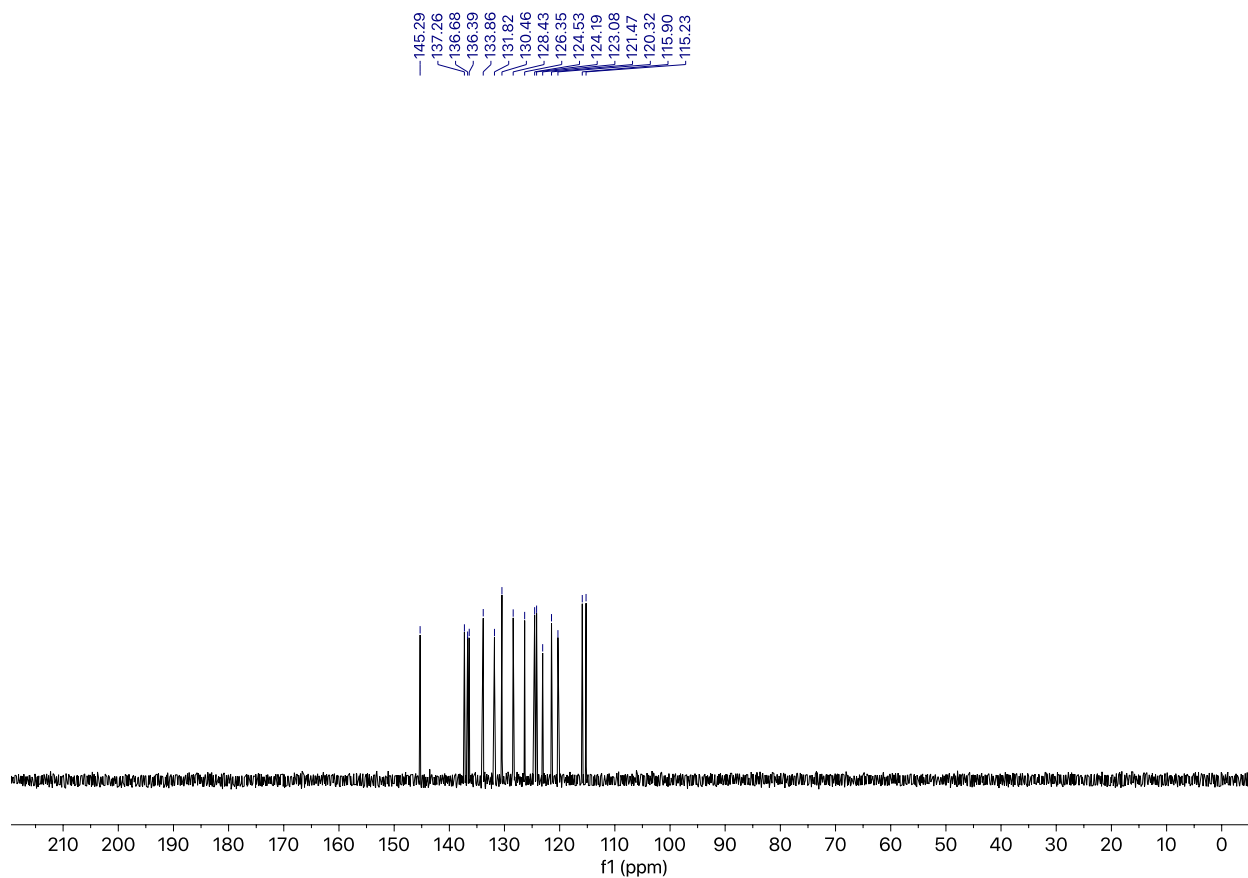

**Figure S23.** Carbon NMR for **3g**.

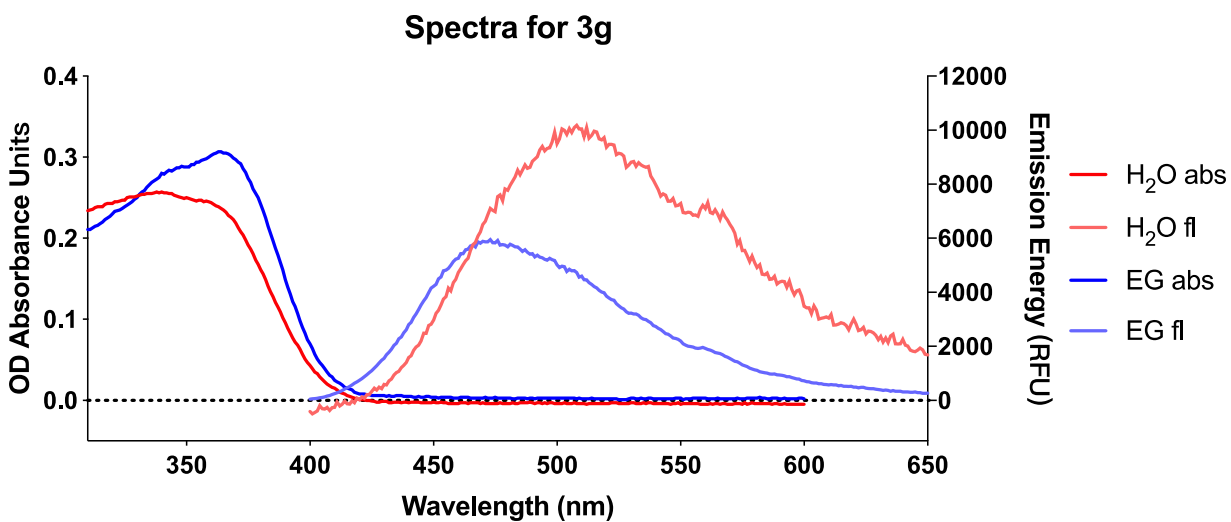

\*Fluorescence spectrum in ethylene glycol was taken at a lower gain to achieve an emission spectrum within the measurement parameters of the instrument.

**Figure S24.** Fluorescent spectra for **3g**.

Sodium 8-((4-Bromophenyl)amino)naphthalene-1-sulfonate (**3h**)

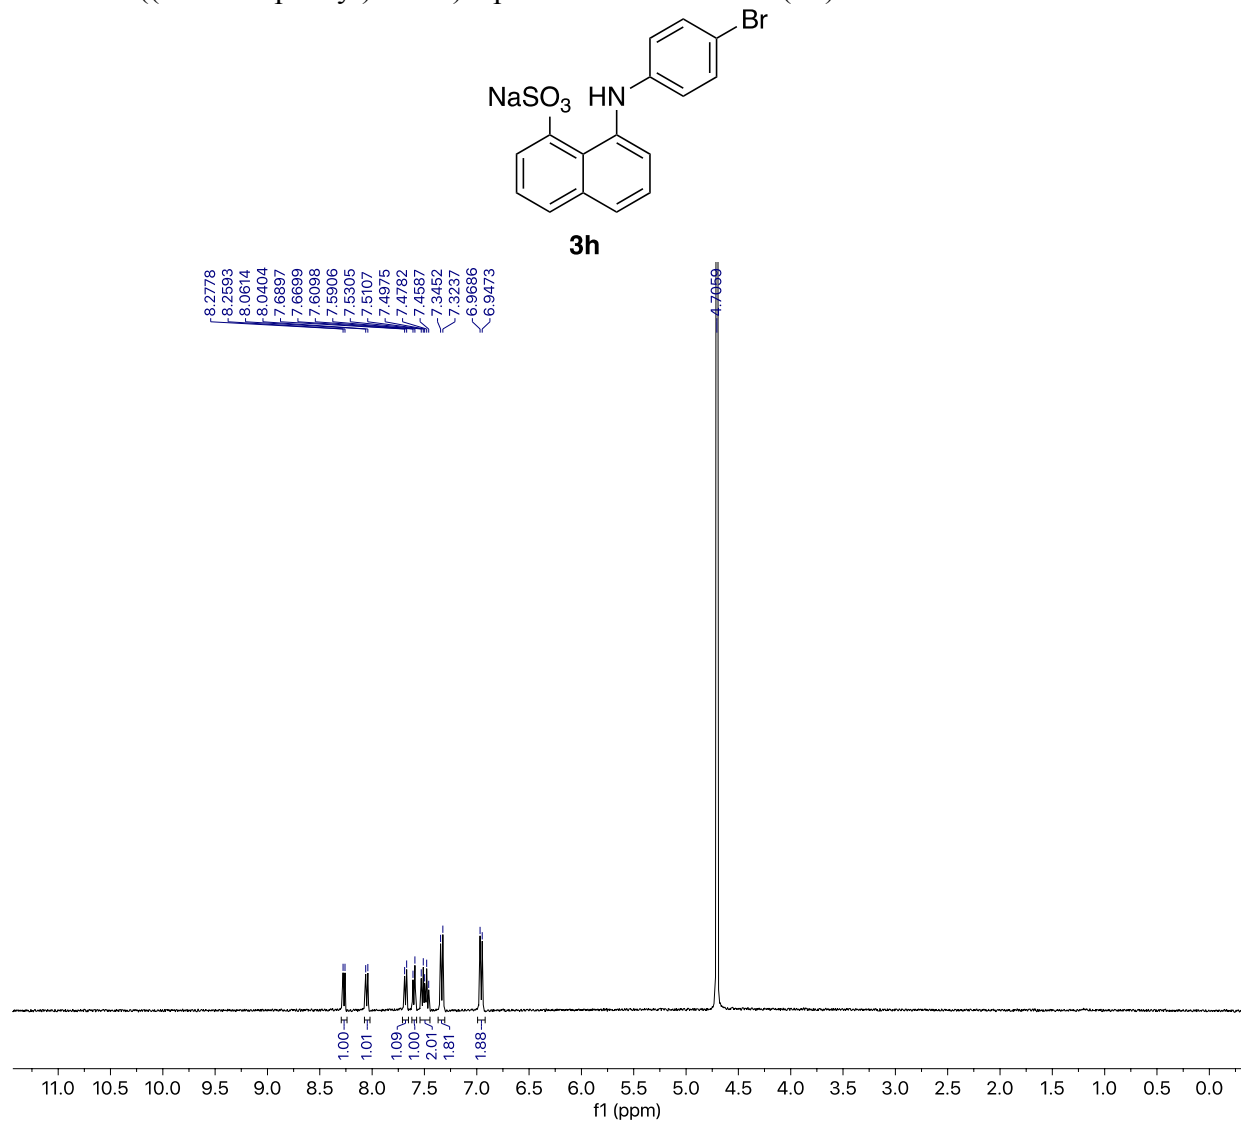

**Figure S25.** Proton NMR for **3h**.

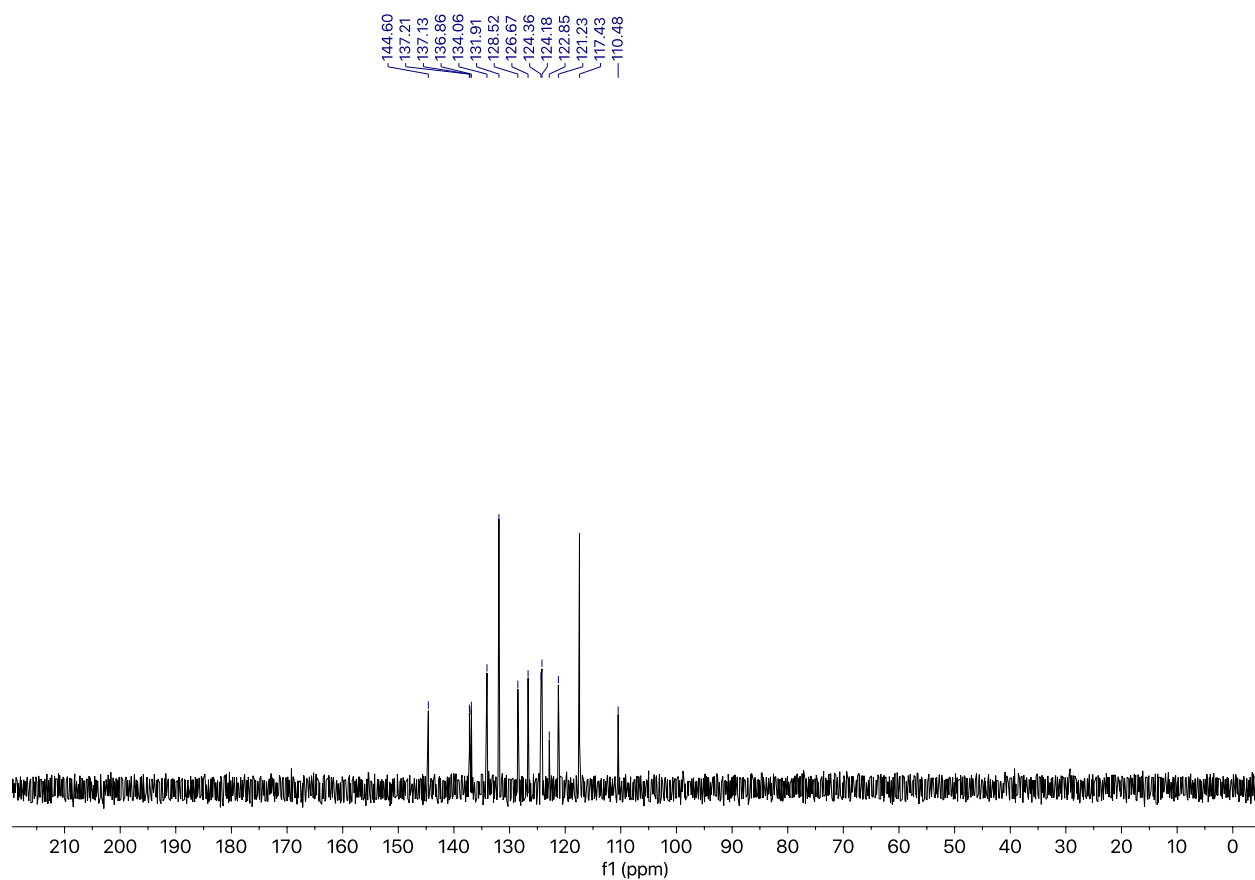

**Figure S26.** Carbon NMR for **3h**.

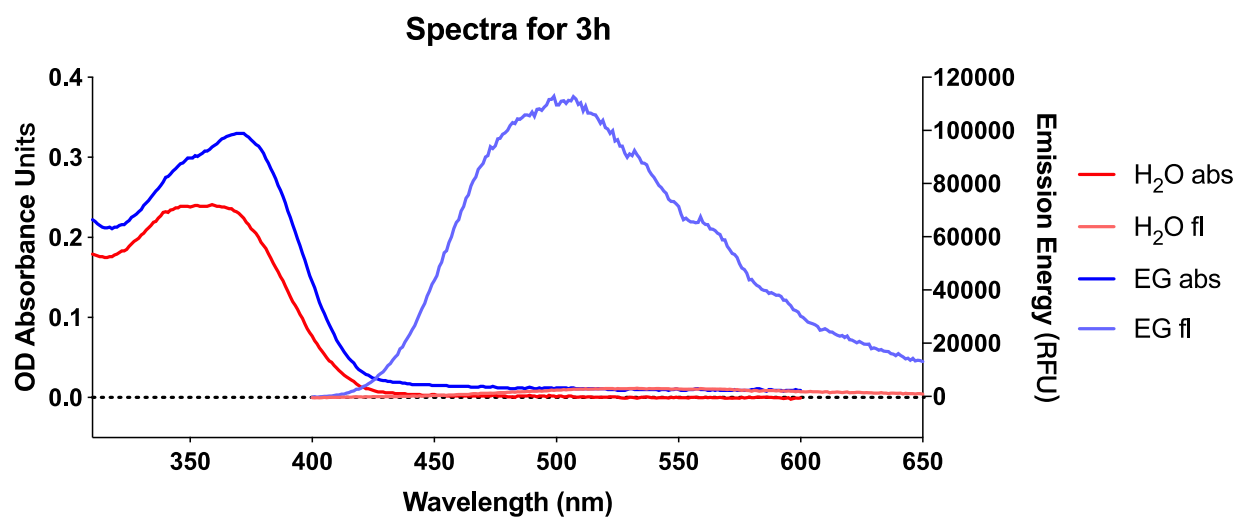

**Figure S27.** Fluorescent spectra for **3h**.



Sodium 8-(*p*-Tolylamino)naphthalene-1-sulfonate (**3i**)

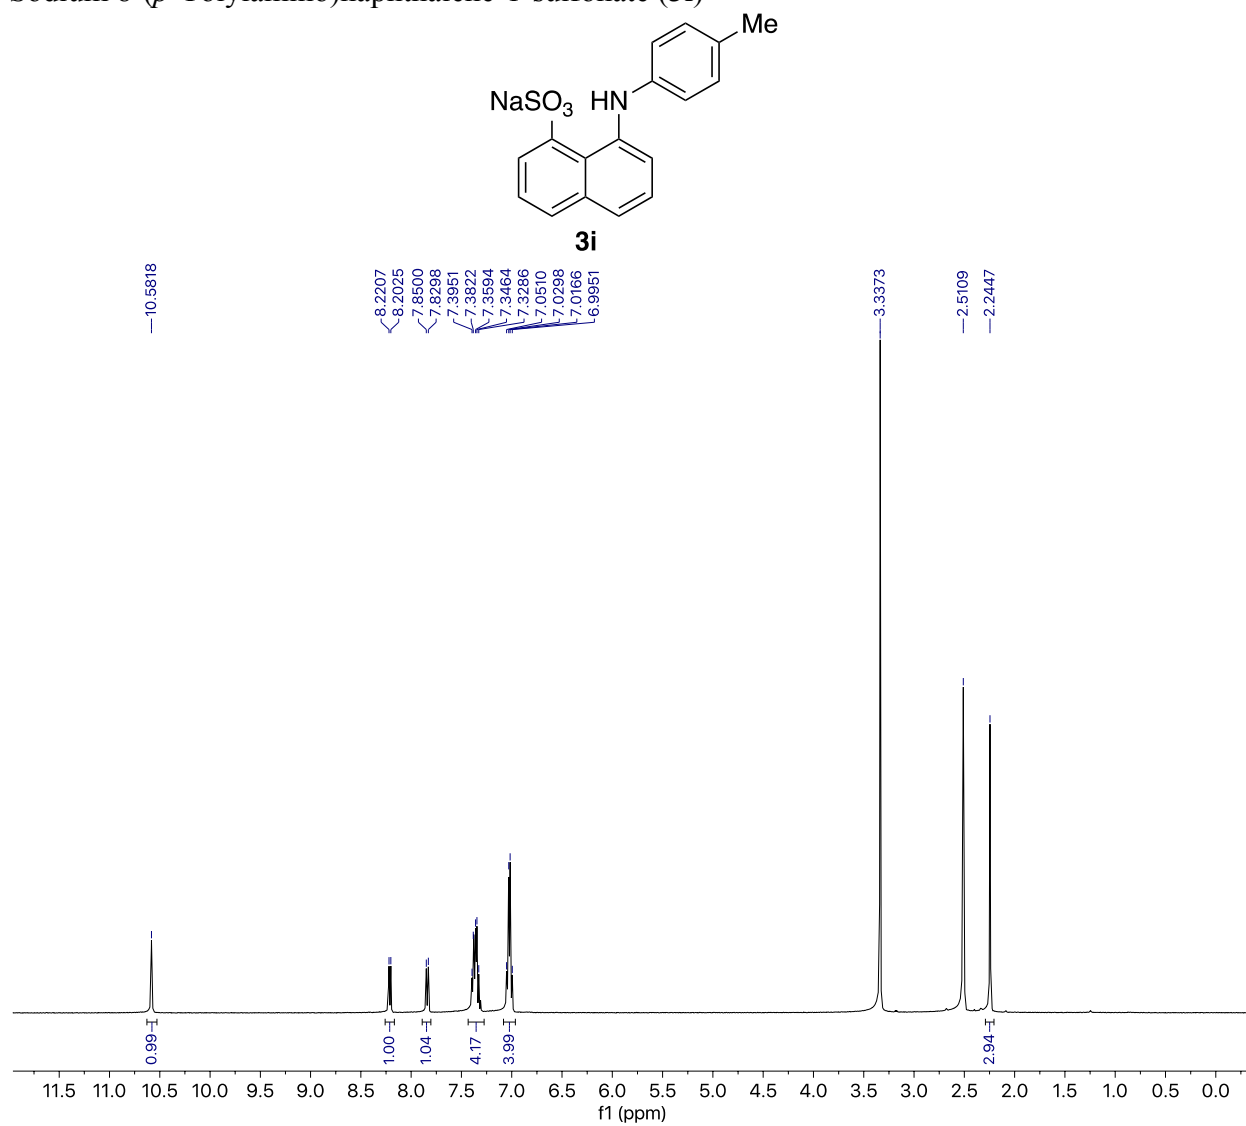

**Figure S28.** Proton NMR for **3i**.

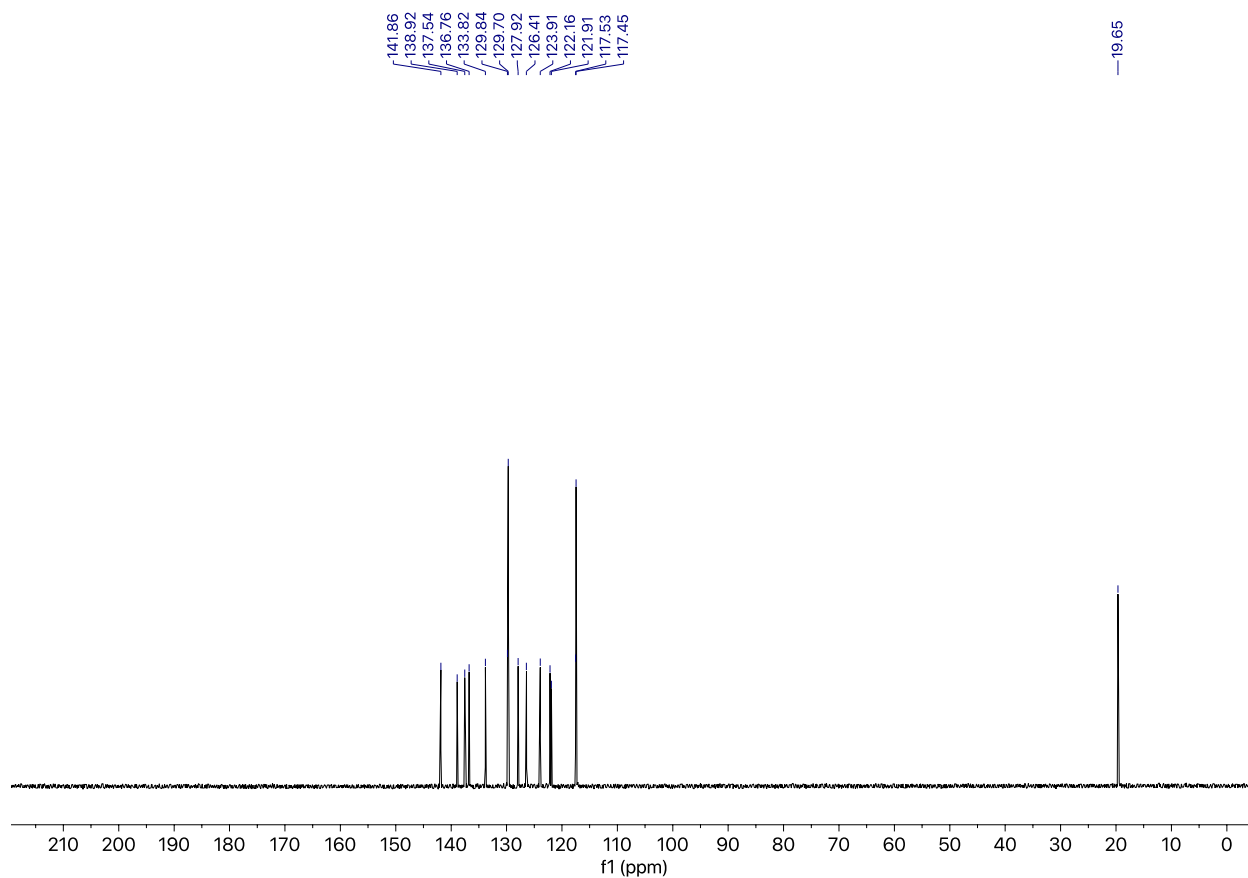

**Figure S29.** Carbon NMR for **3i**.

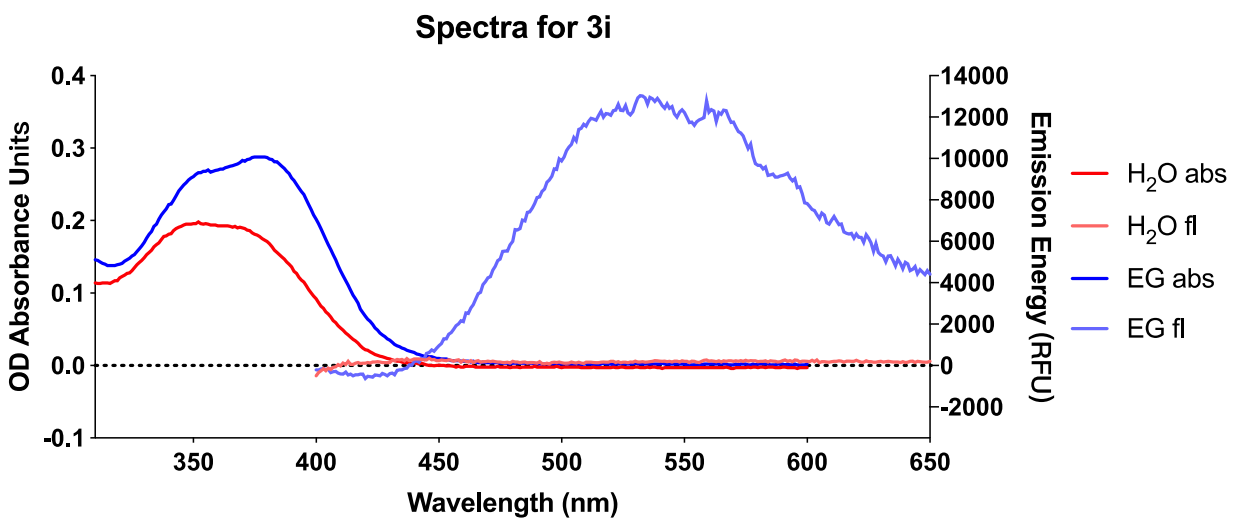

**Figure S30.** Fluorescent spectra for **3i**.

Sodium 8-((4-Methoxyphenyl)amino)naphthalene-1-sulfonate (**3j**)

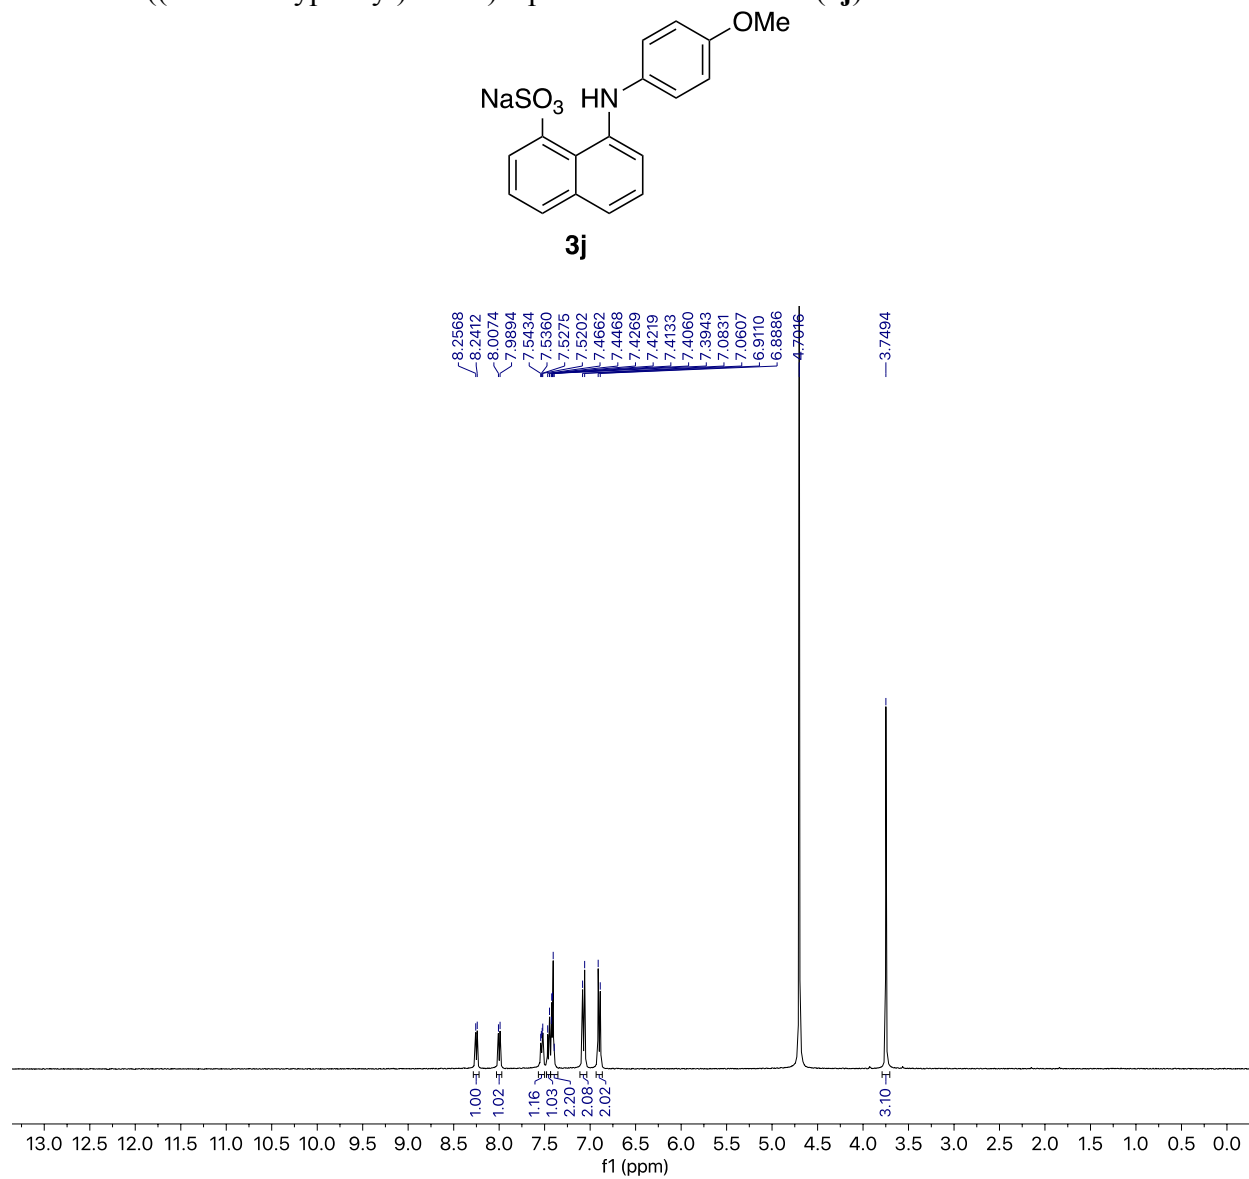

**Figure S31.** Proton NMR for **3j**.

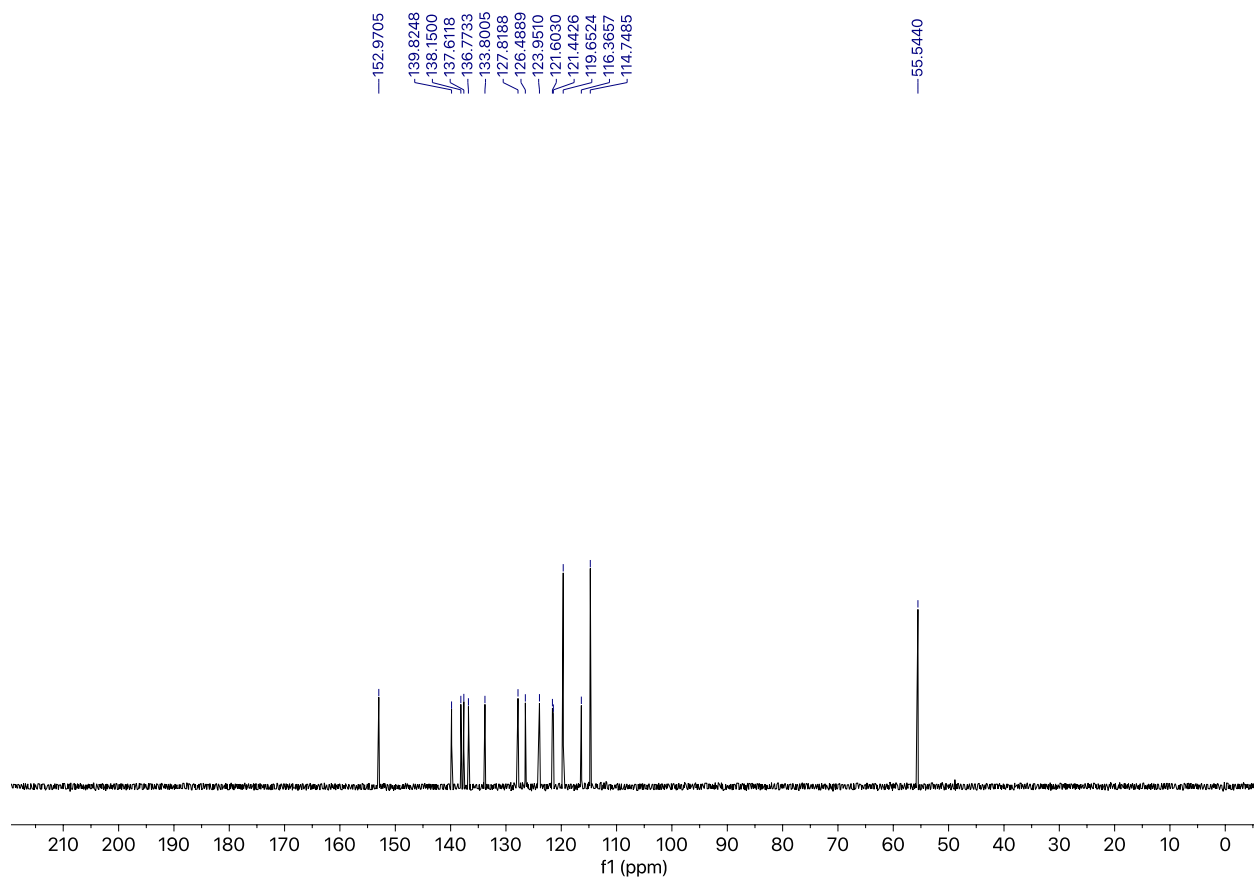

Figure S32. Carbon NMR for **3j**.

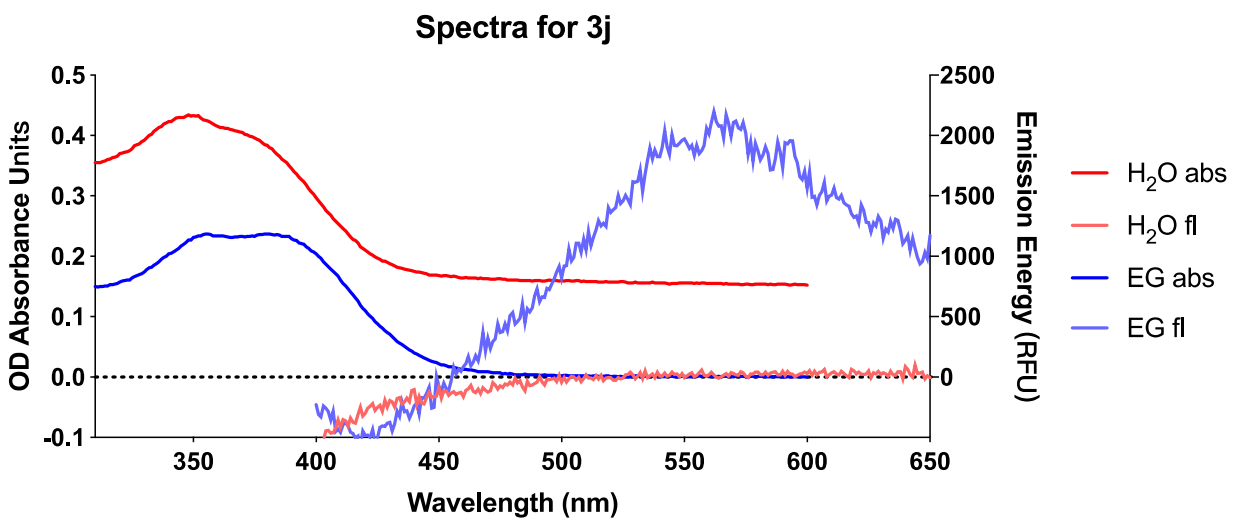

Figure S33. Fluorescent spectra for **3j**.

Sodium 8-((4-Oxidophenyl)amino)naphthalene-1-sulfonate (**3k**)

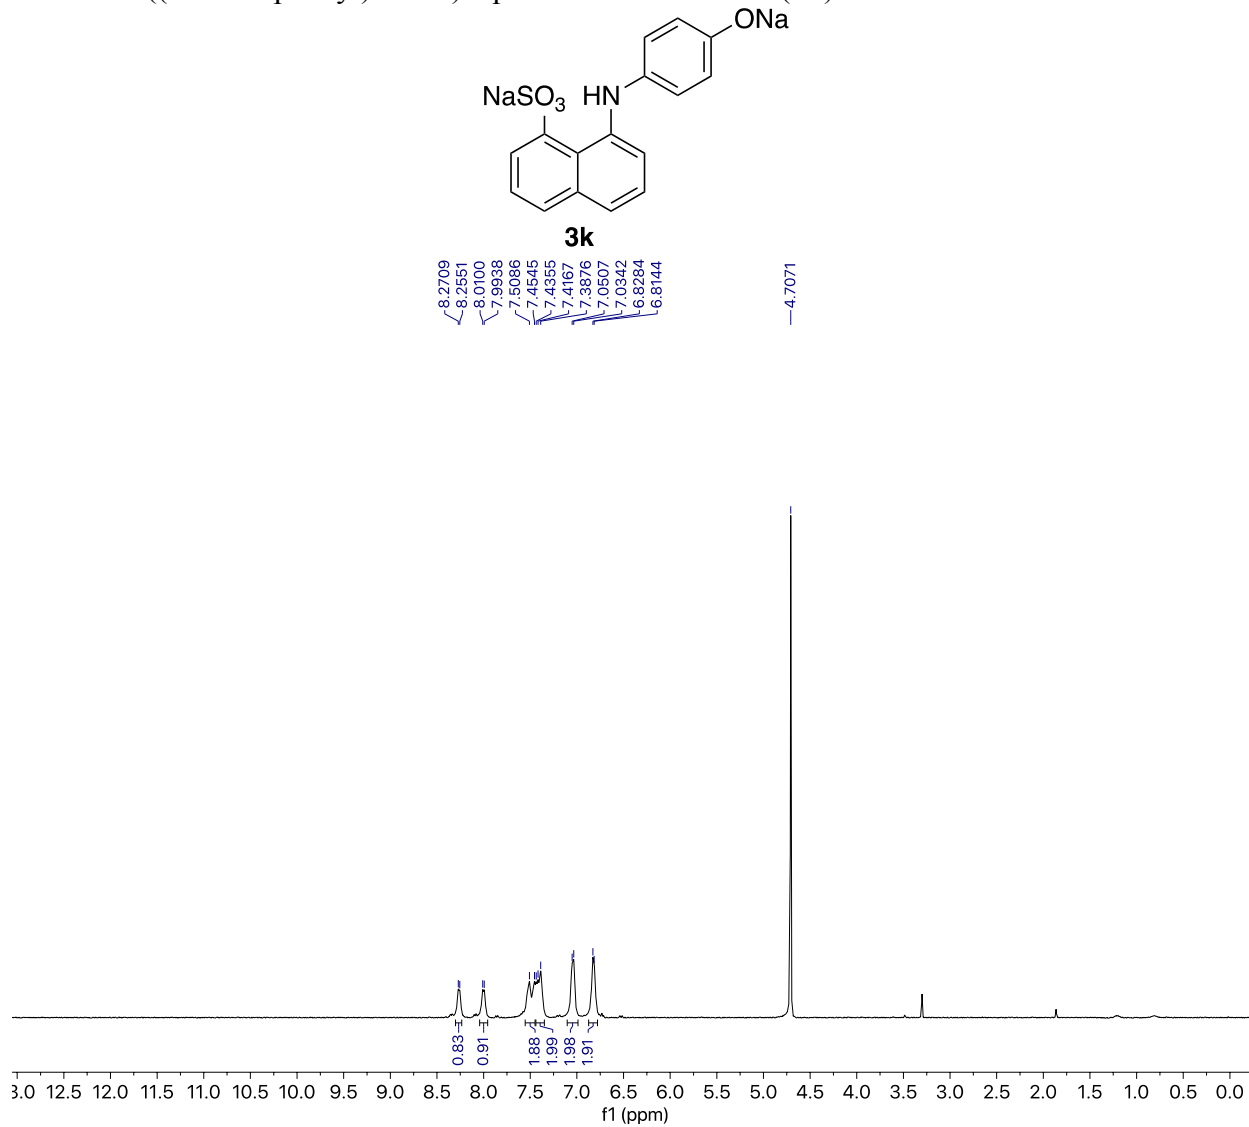

**Figure S34.** Proton NMR for **3k**.

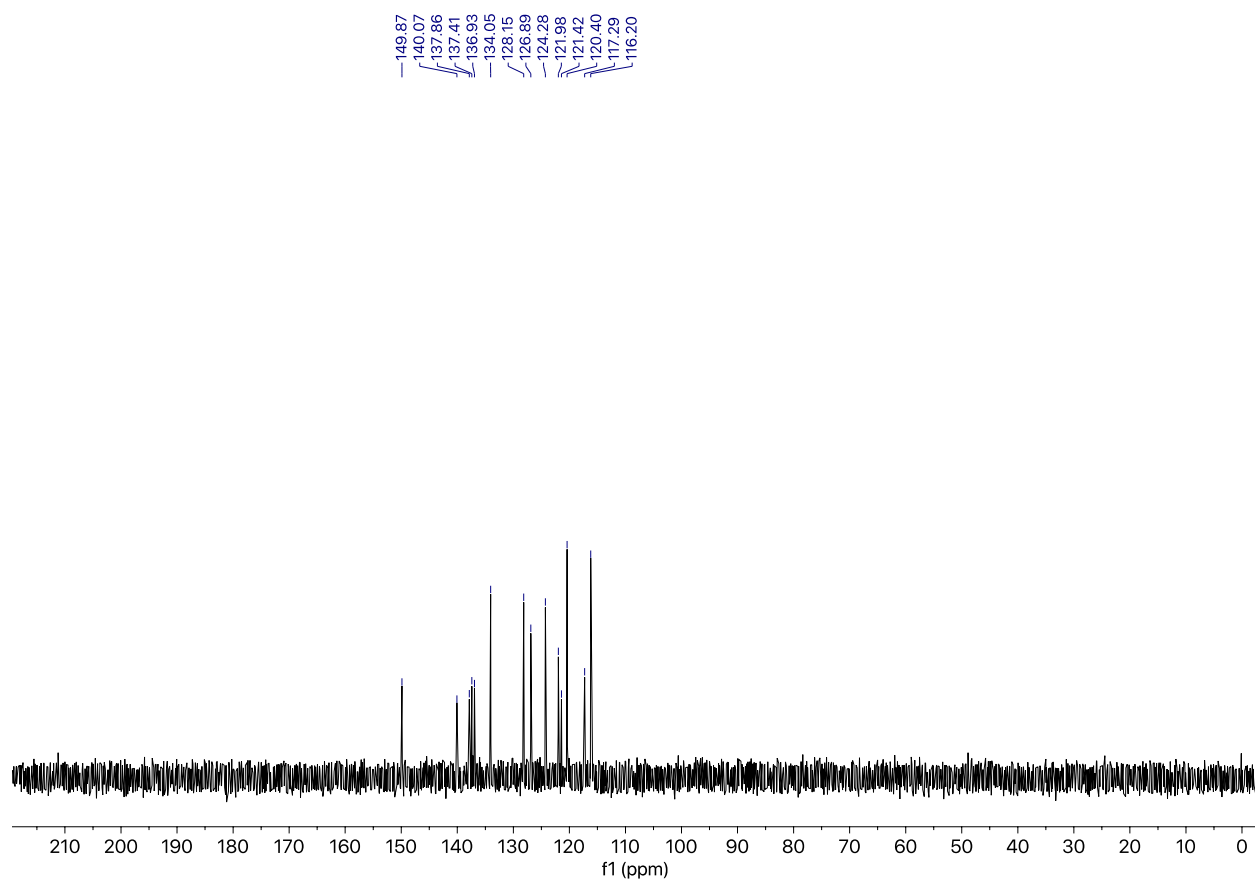

**Figure S35.** Carbon NMR for **3k**.

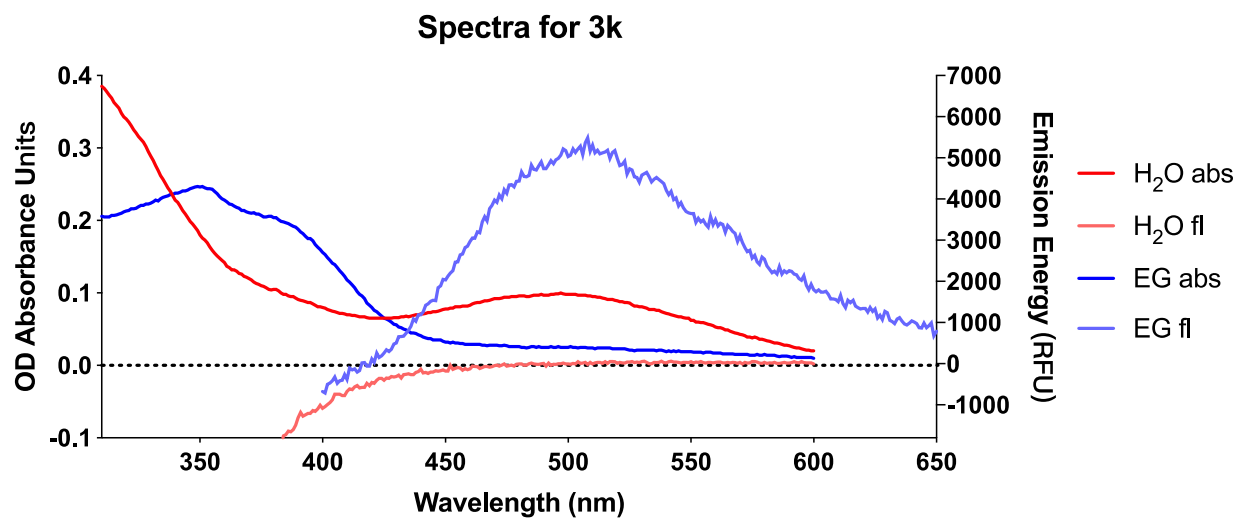

**Figure S36.** Fluorescent spectra for **3k**.

Sodium 8-((4-Cyanophenyl)amino)naphthalene-1-sulfonate (**3I**)

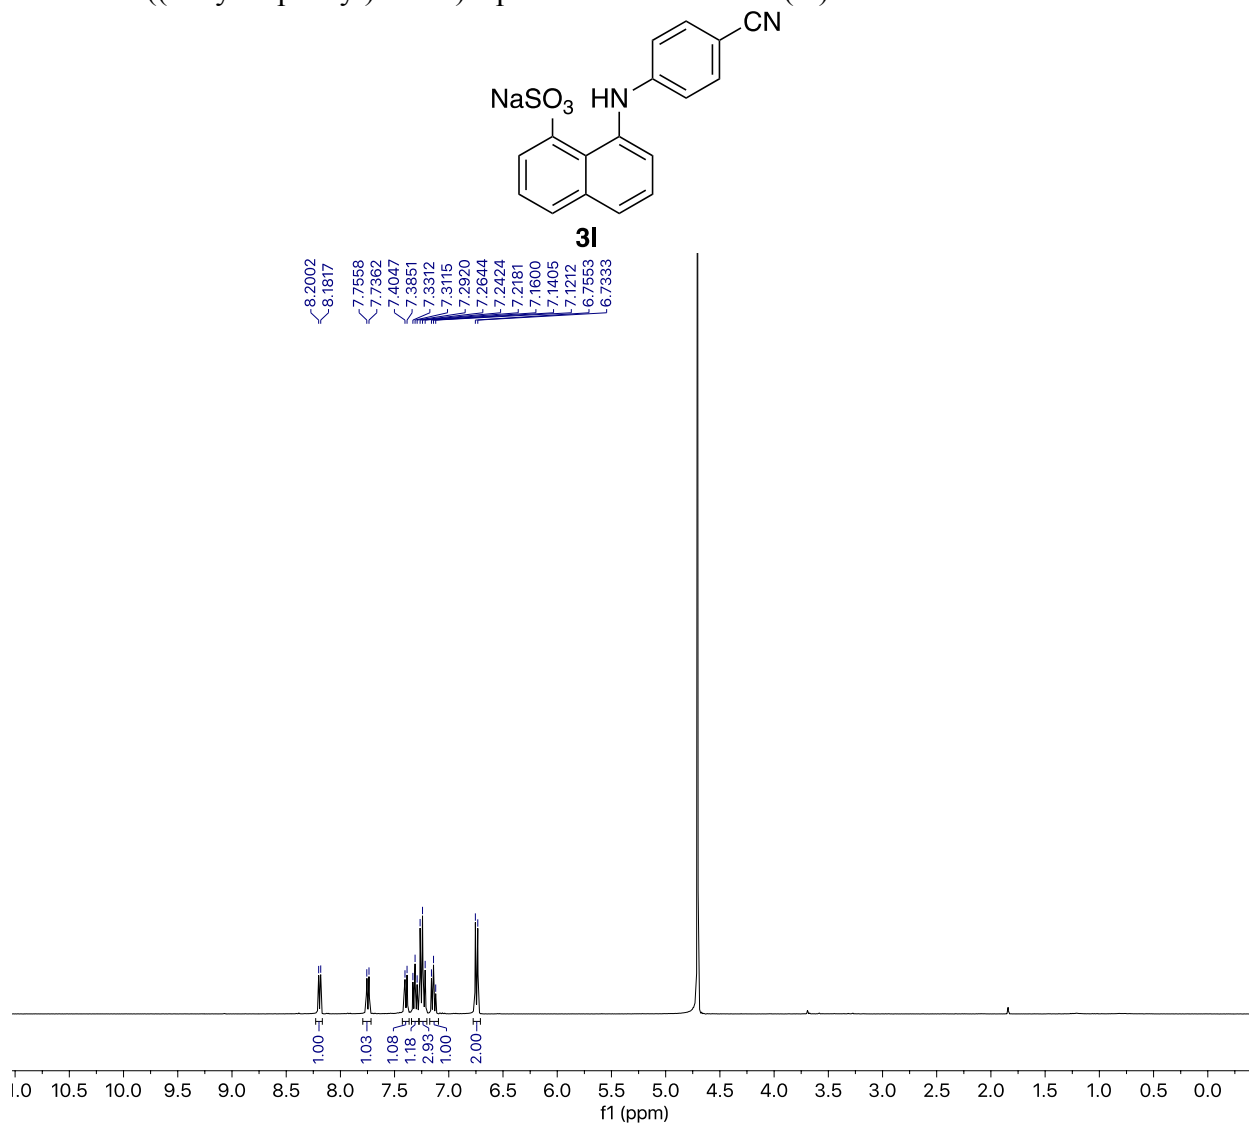

**Figure S37.** Proton NMR for **3I**.

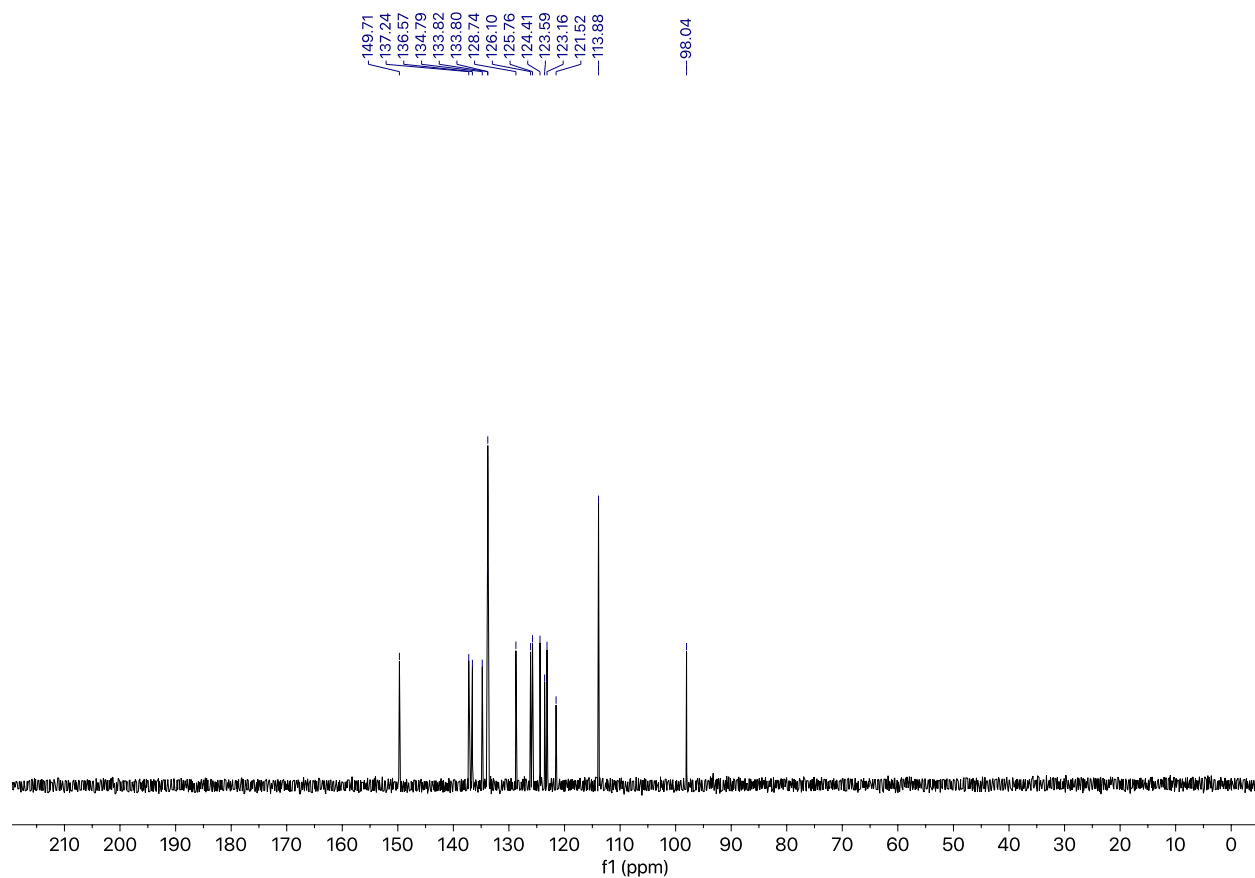

Figure S38. Carbon NMR for **31**.

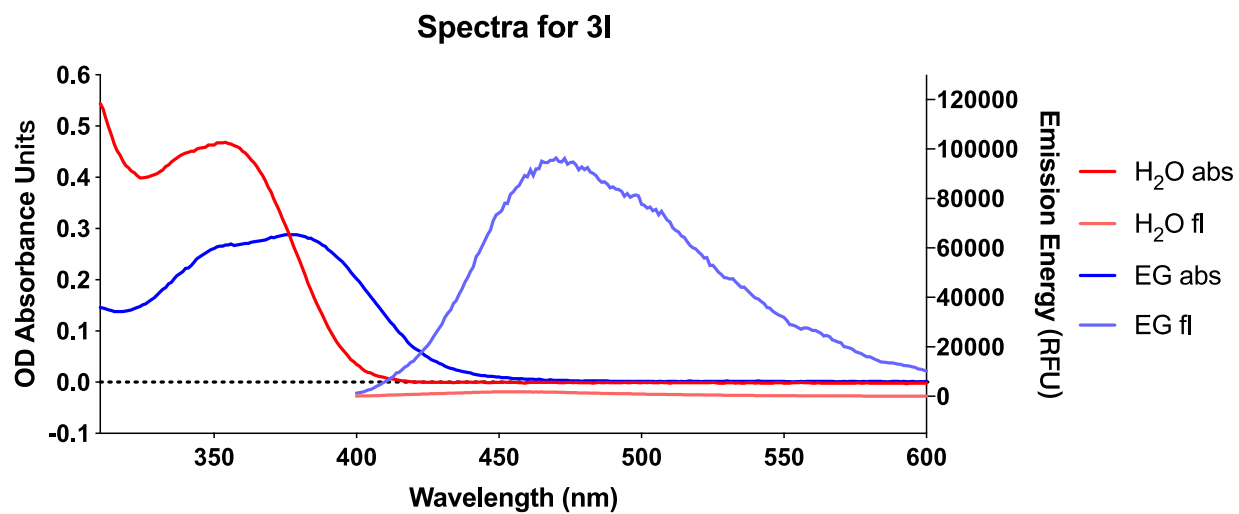

Figure S39. Fluorescent spectra for **31**.



Sodium 8-((4-Nitrophenyl)amino)naphthalene-1-sulfonate (**3m**)

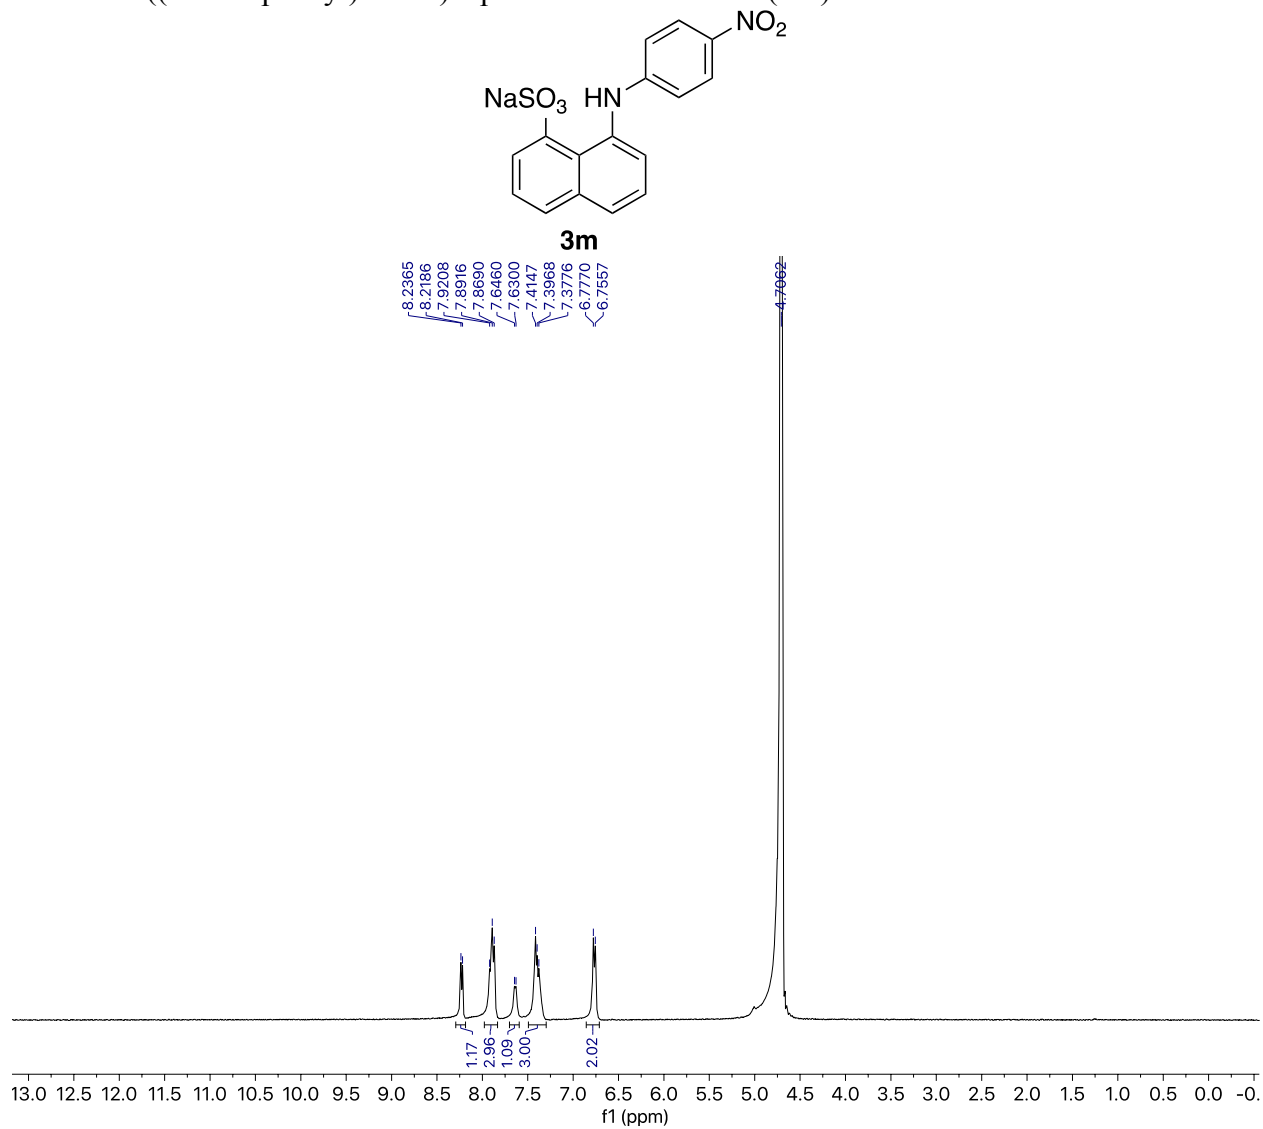

**Figure S40.** Proton NMR for **3m**.

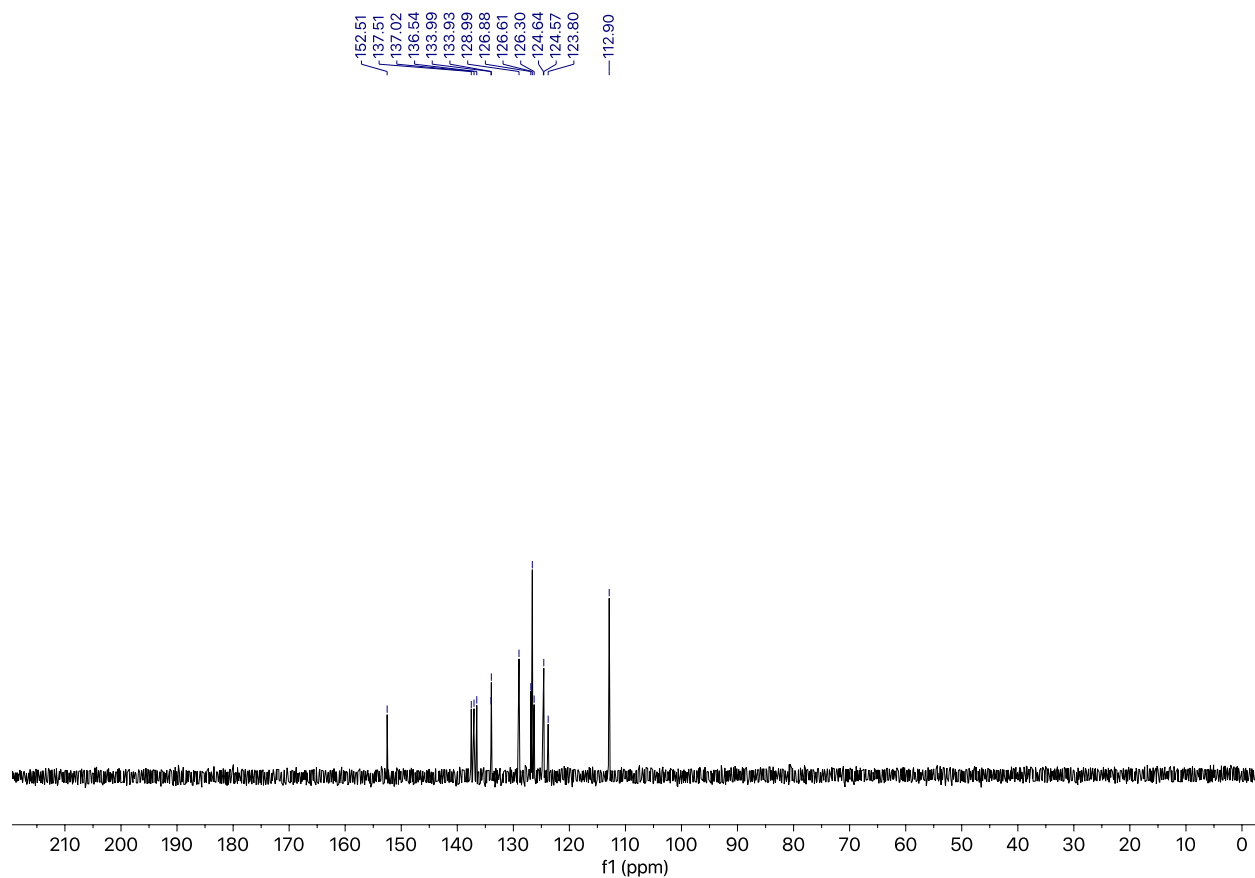

**Figure S41.** Carbon NMR for **3m**.

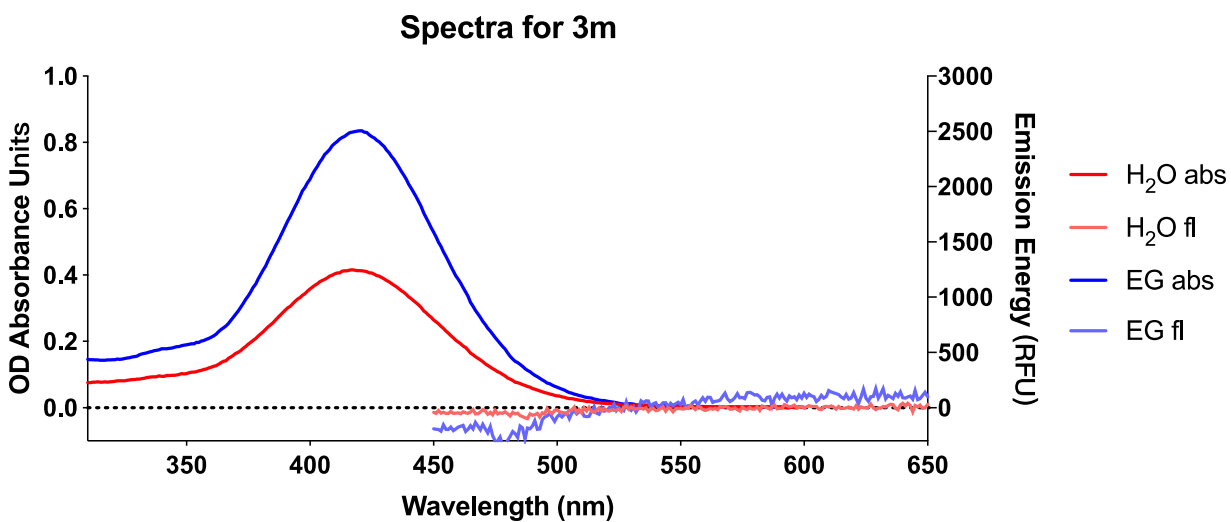

**Figure S42.** Fluorescent spectra for **3m**.

Sodium 8-([1,1'-Biphenyl]-4-ylamino)naphthalene-1-sulfonate (**3n**)

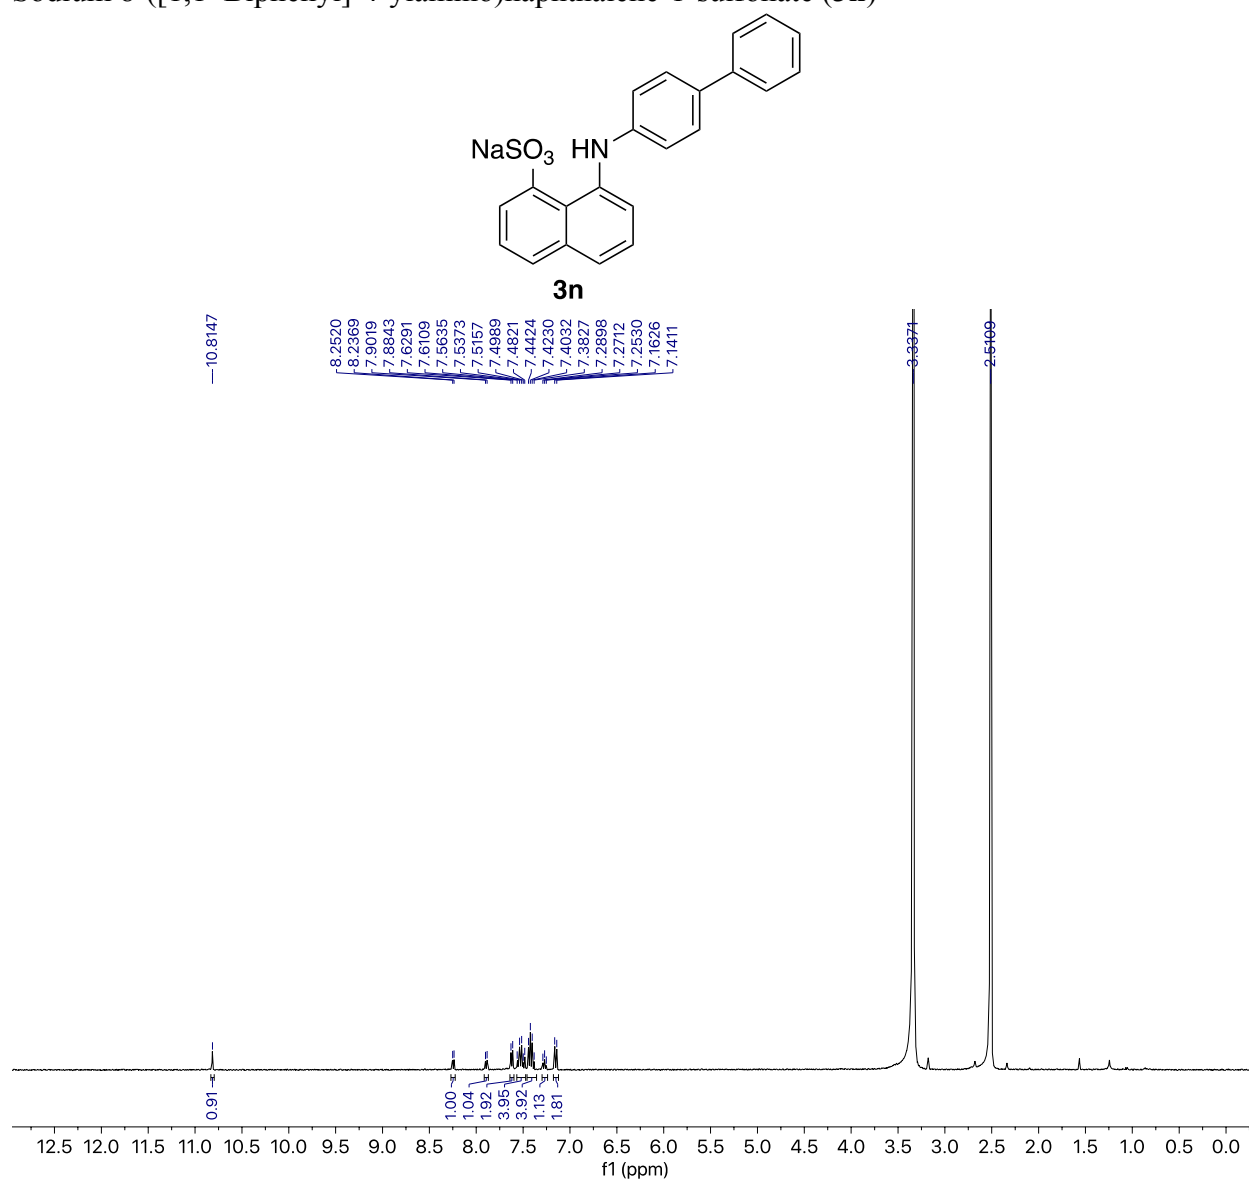

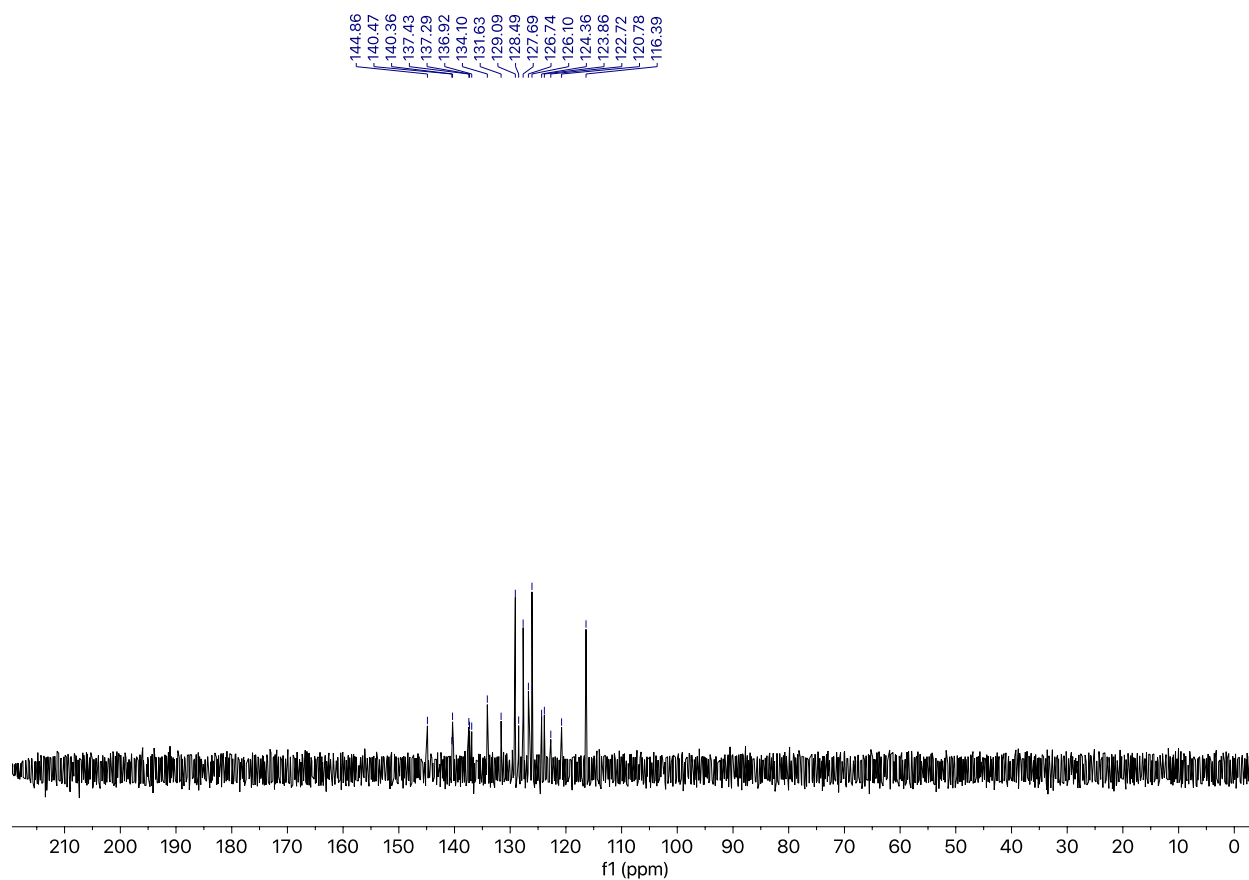

**Figure S44.** Carbon NMR for **3n**.

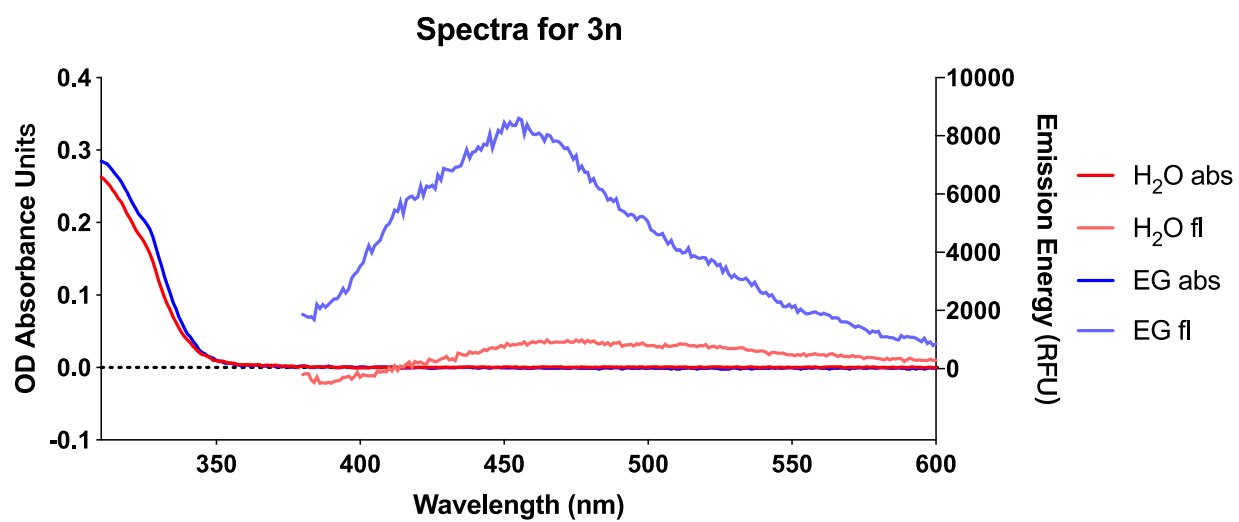

**Figure S45.** Fluorescent spectra for **3n**.

Sodium 8-((4-Acetamidophenyl)amino)naphthalene-1-sulfonate (**3o**)

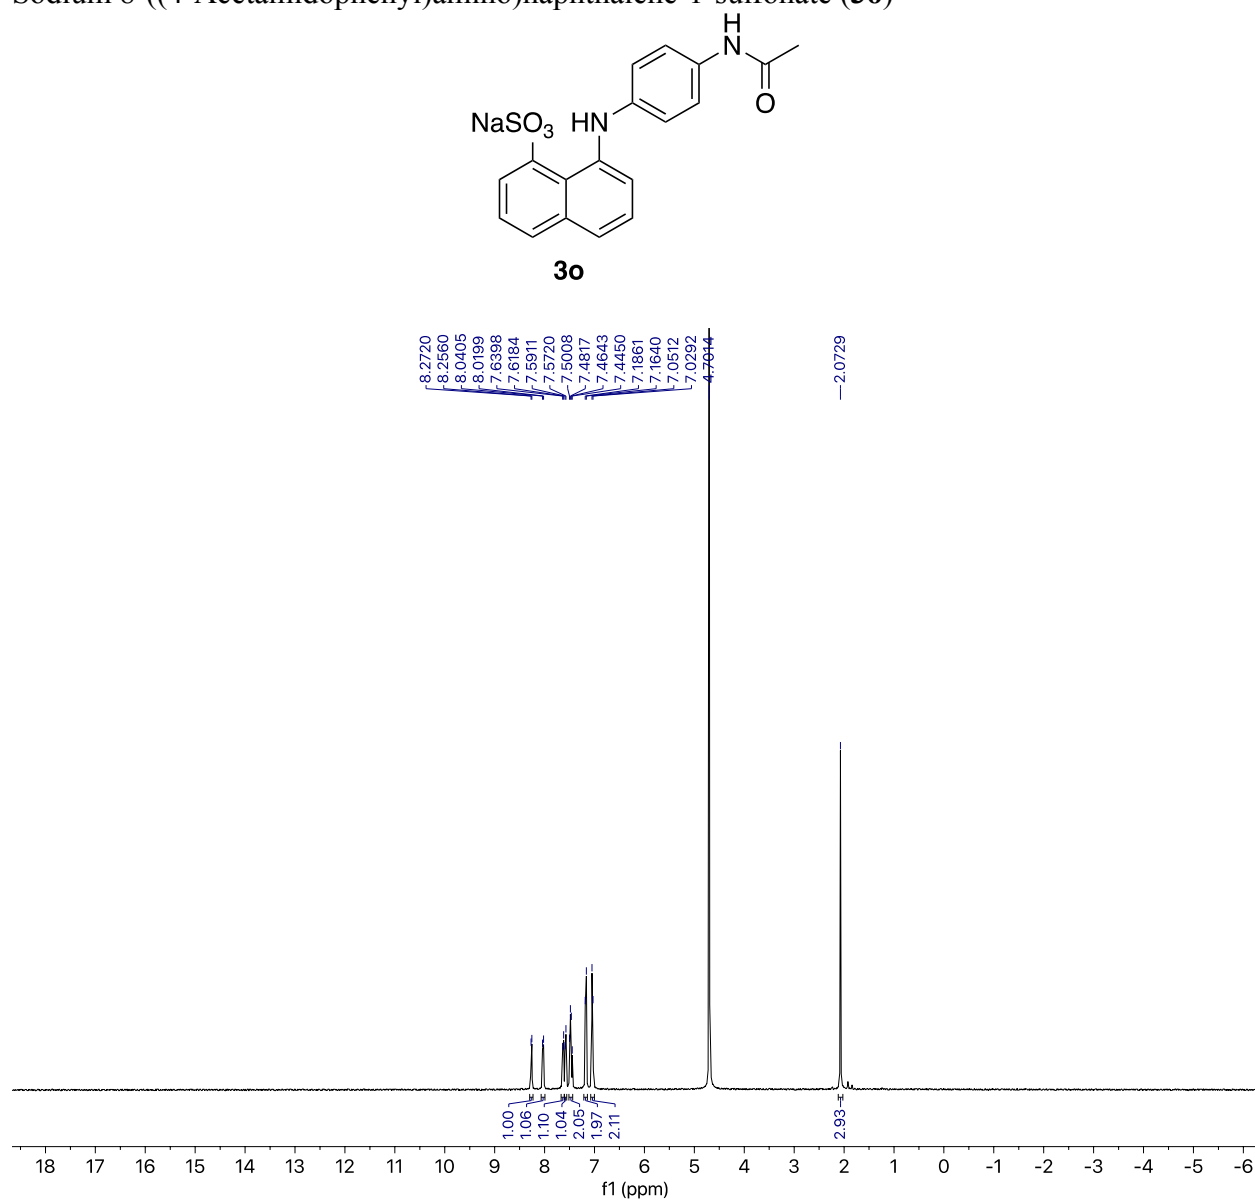

**Figure S46.** Proton NMR for **3o**.

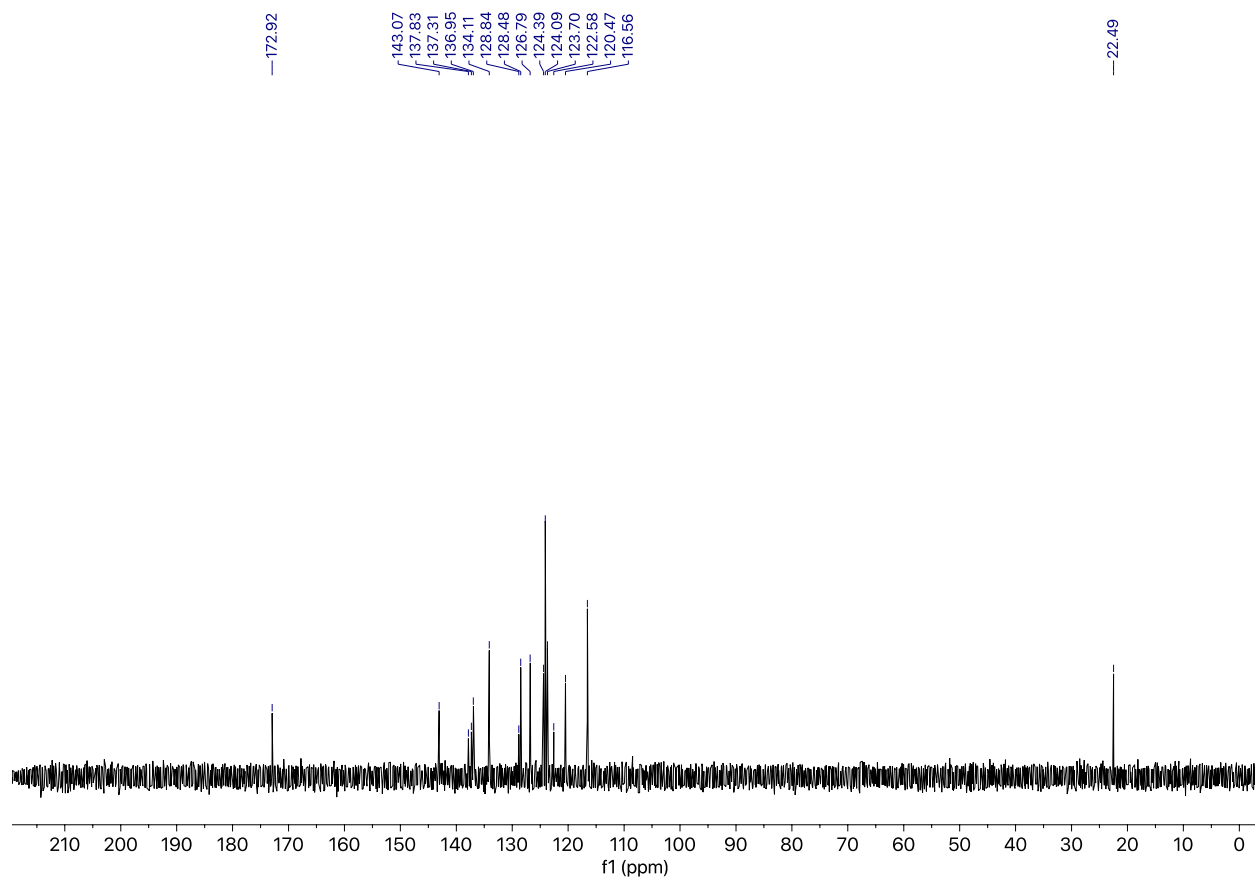

**Figure S47.** Carbon NMR for **3o**.

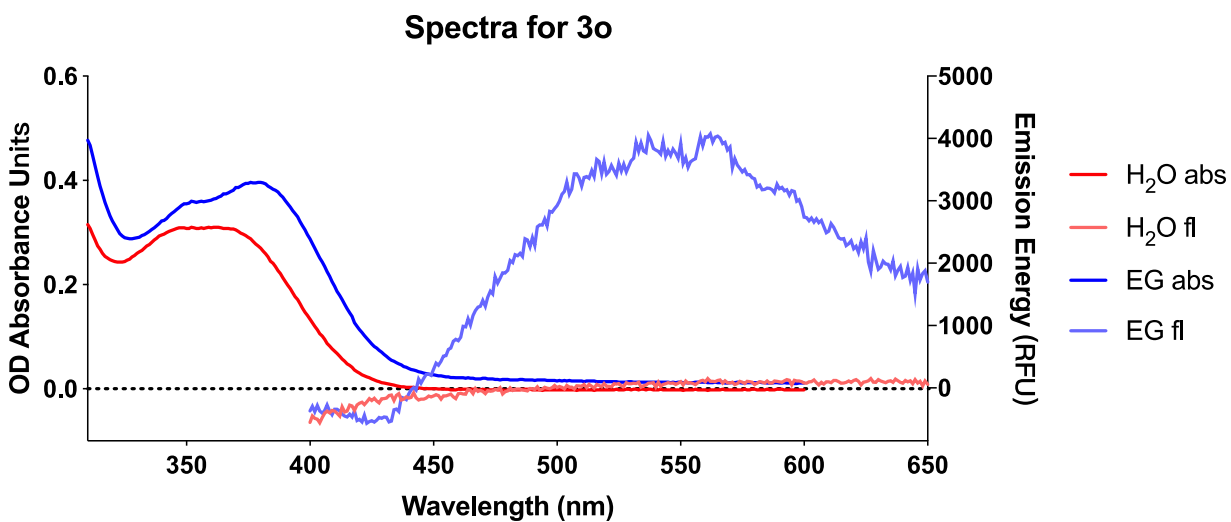

**Figure S48.** Fluorescent spectra for **3o**.

### III. Hammett Plot of ANS derivatives

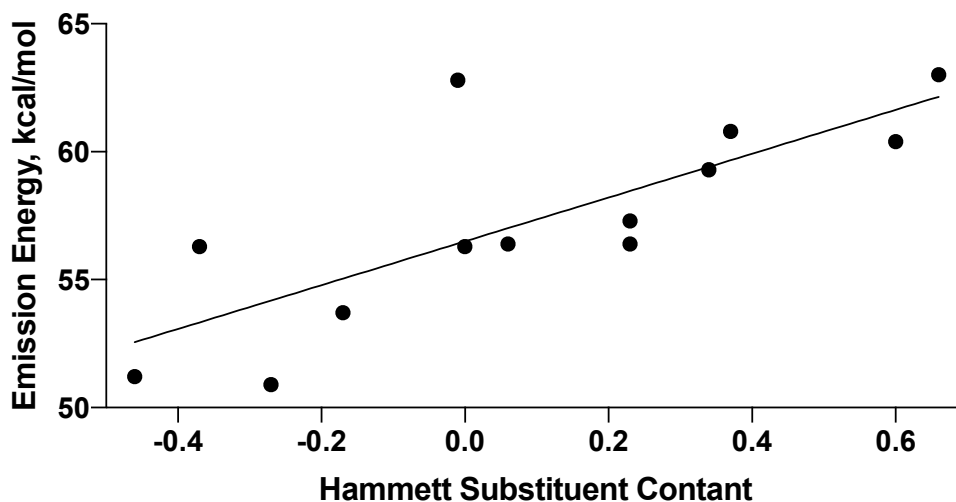

Figure S49. Hammett Plot for ANS derivatives.

### IV. References

1. Baqi, Y.; Muller, C. E. Rapid and efficient microwave-assisted copper(0)-catalyzed ullmann coupling reaction: general access to anilinoanthraquinone derivatives. *Org. Lett.* **2007**, *9*, 1271-1274.
2. Baqi, Y.; Muller, C. E. Synthesis of alkyl- and aryl-amino-substituted anthraquinone derivatives by microwave-assisted copper(0)-catalyzed Ullmann coupling reactions. *Nat. Protoc.* **2010**, *5*, 945-953.
3. Baqi, Y.; Hausmann, R.; Rosefort, C.; Rettinger, J.; Schmalzing, G.; Muller, C. E. Discovery of potent competitive antagonists and positive modulators of the P2X2 receptor. *J. Med. Chem.* **2011**, *54*, 817-830.
4. Buck, E.; Song, Z. J.; Tschaen, D.; Dormer, P. G.; Volante, R. P.; Reider, P. J. Ullmann diaryl ether synthesis: rate acceleration by 2,2,6,6-tetramethylheptane-3,5-dione. *Org. Lett.* **2002**, *4*, 1623-1626.
5. Sun, Q.; Zhang, Y. Y.; Sun, J.; Han, Y.; Jia, X.; Yan, C. G. Copper-catalyzed selective 1,2-dialkylation of N-heteroarenes via a radical addition/reduction process: application for the construction of alkylated dihydroazaarenes derivatives. *J. Org. Chem.* **2018**, *83*, 6640-6649.
